# Supplementary material for: Improved genome assembly and annotation of the soybean aphid (Aphis glycines Matsumura)
Source: bioRxiv preprint, doi:10.1101/781617, version 1 (2019-09-25)
Supplement: Supplementary Table 1 [file 781617_file03.xlsx]

## Sheet: Sheet1
Name	Length	GC content	Number of Ns in sequence	Average coverage	BlobTools taxonomy assignment (Order)	BlobTools taxonomy score	BlobTools taxonomy c-index
scaffold1492	50081	0.2719	22	69.187	Hemiptera	18661	0
scaffold1491	50087	0.2488	7	52.037	Hemiptera	139	0
scaffold1689	50096	0.3348	0	109.917	Hemiptera	12545	1
scaffold1490	50205	0.2787	2	72.935	no-hit	0	None
scaffold1521	50224	0.2858	113	66.718	Hemiptera	3277	3
scaffold1489	50344	0.2998	52	77.878	no-hit	0	None
scaffold1488	50422	0.2997	1	88.089	Hemiptera	9977	1
scaffold1487	50428	0.2571	0	54.21	Hemiptera	1740	0
scaffold1486	50479	0.2979	0	77.6	Hemiptera	9171	3
scaffold1484	50586	0.2748	20	77.123	Hemiptera	13048	2
scaffold1483	50593	0.3225	25	110.481	Hemiptera	4504	0
scaffold1482	50717	0.2479	0	51.09	Hemiptera	18609	0
scaffold1481	50734	0.2506	0	54.115	no-hit	0	None
scaffold1518	50752	0.246	20	58.525	Hemiptera	40365	0
scaffold1480	50780	0.2421	2	38.291	no-hit	0	None
scaffold1479	50821	0.2655	1	68.3	no-hit	0	None
scaffold1478	50842	0.2545	0	58.282	Hemiptera	30099	0
scaffold1477	51020	0.2684	2	70.414	Asterales	1664	1
scaffold1476	51043	0.2942	78	133.044	Hemiptera	37189	0
scaffold1475	51127	0.2795	25	81.569	no-hit	0	None
scaffold1474	51152	0.2626	0	60.802	Hemiptera	4929	0
scaffold1523	51175	0.2642	62	182.681	Hemiptera	6751	0
scaffold1473	51408	0.3022	34	104.277	Hemiptera	12660	0
scaffold1485	51681	0.2984	2	113.565	Hemiptera	1131	2
scaffold1471	51722	0.2745	0	74.423	Hemiptera	29338	1
scaffold1470	51883	0.264	2	68.54	Hemiptera	5658	0
scaffold1469	51959	0.2838	0	84.232	Hemiptera	18501	2
scaffold1468	51992	0.2684	84	56.201	Hemiptera	13293	0
scaffold1467	52158	0.244	2	44.049	Hemiptera	63750	0
scaffold1466	52252	0.241	0	46.227	Hemiptera	9865	0
scaffold1465	52253	0.2546	1	47.98	Hemiptera	156	0
scaffold1463	52341	0.2775	1	80.018	Hemiptera	32574	0
scaffold1493	52347	0.2689	121	64.077	Hemiptera	26158	0
scaffold1462	52487	0.2512	3	148.51	Hemiptera	1583	0
scaffold1459	52702	0.2719	0	70.166	Hemiptera	29251	1
scaffold1457	52801	0.2759	6	239.928	Hemiptera	71469	2
scaffold1456	52842	0.484	0	1457.5	no-hit	0	None
scaffold1455	52887	0.2549	14	56.695	Hemiptera	5146	0
scaffold1454	52934	0.3046	18	99.113	no-hit	0	None
scaffold1453	53151	0.2554	199	67.268	Hemiptera	3297	0
scaffold1451	53374	0.2584	0	56.569	Hemiptera	9113	0
scaffold1449	53385	0.238	5	40.03	Hemiptera	11207	0
scaffold1447	53636	0.2463	1	51.339	Hemiptera	1671	0
scaffold1461	53657	0.318	1	106.332	Hemiptera	24479	0
scaffold1446	53707	0.2771	1	78.755	Hemiptera	6583	0
scaffold1519	53714	0.2796	11	95.632	Hemiptera	11810	1
scaffold1542	53753	0.2759	5	81.436	Hemiptera	14760	0
scaffold1445	53755	0.2667	2	75.175	Hemiptera	9643	1
scaffold1444	53770	0.2555	1	58.544	Hemiptera	67650	1
scaffold1443	53779	0.2519	2	57.541	Hemiptera	4049	0
scaffold1442	53856	0.2564	0	71.025	Hemiptera	13140	0
scaffold1440	54016	0.2992	0	126.218	Hemiptera	8699	0
scaffold1458	54056	0.2546	78	56.153	Hemiptera	38484	0
scaffold1804	54073	0.2822	0	75.953	Hemiptera	4020	1
scaffold1437	54137	0.2387	0	39.139	Hemiptera	599	0
scaffold1436	54160	0.2588	0	61.133	Hemiptera	61487	0
scaffold1434	54317	0.2514	0	47.236	Hemiptera	4424	0
scaffold1809	54390	0.2595	256	60.334	Hemiptera	62055	2
scaffold1432	54416	0.2981	1	77.867	Hemiptera	577	0
scaffold1430	54470	0.2405	2	44.163	Hemiptera	13128	0
scaffold1431	54470	0.2724	0	73.002	Hemiptera	2272	0
scaffold1429	54592	0.2704	2	78.2	Hemiptera	5407	0
scaffold1428	54663	0.2739	1	70.323	Hemiptera	1325	0
scaffold1426	54732	0.2456	584	131.803	no-hit	0	None
scaffold1425	54742	0.2736	0	85.853	Hemiptera	57057	0
scaffold1424	54776	0.247	4	47.573	no-hit	0	None
scaffold1472	54896	0.3171	9	1375.39	Hemiptera	8774	1
scaffold1420	54962	0.2931	6525	145.183	Hemiptera	6659	0
scaffold1419	54969	0.2626	0	63.11	Hemiptera	6234	0
scaffold1418	55078	0.3039	5	183.507	Hemiptera	15359	2
scaffold1417	55153	0.2374	302	40.251	Hemiptera	2301	0
scaffold1416	55201	0.242	2	47.374	Hemiptera	27285	0
scaffold1438	55300	0.2766	6	346.102	Asterales	1059	1
scaffold1569	55451	0.2425	6	48.747	Hemiptera	2012	0
scaffold1415	55496	0.2694	0	63.906	Hemiptera	14698	0
scaffold1414	55704	0.3027	597	140.69	Hemiptera	23390	1
scaffold1713	55710	0.2943	6	99.69	Hemiptera	14615	0
scaffold1413	55726	0.2713	0	58.514	Hemiptera	1823	2
scaffold1505	55748	0.3074	1	119.014	Hemiptera	4032	0
scaffold1412	55755	0.2745	0	75.756	Hemiptera	6366	0
scaffold1411	55766	0.2715	211	62.103	Hemiptera	21245	0
scaffold1408	55972	0.2492	0	47.357	Hemiptera	3930	1
scaffold1435	55985	0.2851	0	75.026	Hemiptera	2816	0
scaffold1520	55997	0.29	36	88.374	Hemiptera	35452	0
scaffold1497	56017	0.2614	103	81.08	Hemiptera	4568	0
scaffold1406	56160	0.2614	18	59.356	Hemiptera	12844	0
scaffold1405	56245	0.2522	378	58.598	Hemiptera	2406	0
scaffold1404	56252	0.2597	88	63.354	Hemiptera	10698	1
scaffold1402	56326	0.2501	134	49.532	Hemiptera	5656	0
scaffold1923	56381	0.2856	157	104.015	Hemiptera	5801	1
scaffold1401	56390	0.3095	0	99.721	Hemiptera	1740	1
scaffold1399	56417	0.2648	2	64.377	Hemiptera	7122	0
scaffold1398	56434	0.2624	5	63.998	Hemiptera	858	0
scaffold1427	56448	0.2467	0	48.181	Hemiptera	2681	0
scaffold1396	56480	0.2595	2	610.048	Hemiptera	7950	1
scaffold1395	56674	0.2865	14	81.498	Hemiptera	41198	0
scaffold1394	56768	0.2596	0	56.601	Hemiptera	47694	1
scaffold1392	56925	0.2494	3	54.184	Hemiptera	26602	0
scaffold1391	56926	0.2609	17	53.307	Hemiptera	289	0
scaffold1390	56977	0.2303	1	39.931	no-hit	0	None
scaffold1389	57098	0.2496	19	1770.05	Hemiptera	12010	0
scaffold1388	57207	0.2456	0	46.063	Hemiptera	2692	0
scaffold1407	57239	0.2732	1	77.187	no-hit	0	None
scaffold1387	57265	0.3073	2	115.461	Hemiptera	11617	1
scaffold1386	57337	0.2476	126	43.23	Hemiptera	17562	0
scaffold1385	57358	0.2644	4	73.228	Hemiptera	6019	0
scaffold1384	57374	0.2689	2	70.058	Hemiptera	1522	0
scaffold1383	57377	0.2837	1	84.812	Hemiptera	23281	3
scaffold1382	57425	0.3368	11	135.199	Hemiptera	26112	0
scaffold1381	57463	0.2827	0	76.278	no-hit	0	None
scaffold1380	57464	0.2474	454	30.075	Hemiptera	50984	0
scaffold1712	57593	0.296	2	103.805	Hemiptera	10683	0
scaffold1378	57638	0.2552	2	45.82	Hemiptera	44408	1
scaffold1376	57709	0.2474	0	57.766	no-hit	0	None
scaffold1377	57709	0.3041	0	104.935	Hemiptera	16074	0
scaffold1375	57728	0.2433	22	41.866	Hemiptera	282	0
scaffold1373	57853	0.2878	0	77.159	Hemiptera	23239	0
scaffold1372	58061	0.241	14	39.831	Hemiptera	521	0
scaffold1371	58093	0.2691	0	67.742	Hemiptera	21930	0
scaffold1369	58185	0.2783	0	82.2	Hemiptera	1102	0
scaffold1368	58289	0.2514	2	50.677	Hemiptera	7647	0
scaffold1366	58405	0.2714	0	76.036	Hemiptera	11107	0
scaffold1365	58501	0.2975	11	94.374	no-hit	0	None
scaffold1362	58673	0.2778	0	79.675	Hemiptera	64830	0
scaffold1361	58746	0.2673	2	64.324	Hemiptera	12179	0
scaffold1503	58760	0.2773	12	96.576	Hemiptera	25476	0
scaffold1360	58795	0.2519	0	56.969	Hemiptera	60643	0
scaffold1403	58817	0.2667	92	63.633	Hemiptera	19599	0
scaffold1359	58906	0.2947	132	114.688	Hemiptera	31509	0
scaffold1358	58993	0.2392	0	47.213	Hemiptera	30205	1
scaffold1357	59106	0.257	2	60.938	Asterales	1680	1
scaffold1441	59138	0.263	21	70.022	Hemiptera	26064	0
scaffold1356	59393	0.2528	164	49.571	Hemiptera	30725	0
scaffold1354	59463	0.2632	14	67.865	Hemiptera	18513	0
scaffold1423	59501	0.2908	6	83.18	Hemiptera	17823	1
scaffold1353	59686	0.2944	24	94.29	Hemiptera	13234	1
scaffold1352	59707	0.2933	0	106.499	Hemiptera	20000	1
scaffold1367	59830	0.2671	20	64.519	Hemiptera	1352	0
scaffold1776	59833	0.2827	2	441.06	Hemiptera	50761	1
scaffold1350	59928	0.2589	13	94.136	Hemiptera	393	0
scaffold1349	59931	0.241	34	44.435	Hemiptera	1023	0
scaffold1348	60048	0.2699	0	76.233	Hemiptera	2177	0
scaffold1496	60076	0.2501	0	53.992	Hemiptera	15628	0
scaffold1347	60134	0.2503	0	54.744	Hemiptera	60776	0
scaffold1345	60276	0.2419	0	45.193	Hemiptera	10249	0
scaffold1344	60356	0.272	2	72.311	Hemiptera	29247	4
scaffold1343	60387	0.2806	0	73.596	Hemiptera	4651	4
scaffold1611	60438	0.322	11	106.05	Hemiptera	13951	1
scaffold1342	60458	0.3085	3132	69.79	Hemiptera	7152	0
scaffold1341	60497	0.2531	23	46.958	Hemiptera	25642	0
scaffold1340	60534	0.2506	27	43.94	Hemiptera	25719	0
scaffold1339	60563	0.2547	0	50.474	Hemiptera	14418	2
scaffold1338	60674	0.2838	17	80.046	Hemiptera	25432	0
scaffold1336	60836	0.2987	2	92.282	no-hit	0	None
scaffold1334	60934	0.245	0	49.219	Hemiptera	321	0
scaffold1333	60939	0.2453	19	36.773	Hemiptera	1992	0
scaffold1332	60973	0.2575	34	63.318	Hemiptera	14794	0
scaffold1331	60974	0.2713	1	70.299	Hemiptera	10054	0
scaffold1330	61091	0.2964	13	94.572	Hemiptera	1099	1
scaffold1608	61180	0.2937	110	168.282	Hemiptera	9467	0
scaffold1513	61291	0.2505	1	71.262	Hemiptera	11592	2
scaffold1329	61367	0.2678	2	60.645	Hemiptera	17373	0
scaffold1328	61386	0.2862	2	77.803	Hemiptera	49365	0
scaffold1327	61406	0.246	191	46.962	Hemiptera	389	0
scaffold1325	61573	0.2538	0	73.274	Hemiptera	11840	0
scaffold1323	61771	0.2677	4	75.297	Hemiptera	18791	2
scaffold1337	61835	0.2537	1	53.668	Hemiptera	16774	1
scaffold1321	61849	0.2701	7	414.566	Hemiptera	61869	0
scaffold1320	61933	0.2605	1	59.229	Hemiptera	7997	0
scaffold1319	62124	0.2573	6	120.207	Hemiptera	20414	0
scaffold1318	62148	0.251	6	54.738	Hemiptera	5243	0
scaffold1317	62244	0.2599	0	57.279	Hemiptera	8463	0
scaffold1316	62293	0.2269	30	36.174	Hemiptera	1036	0
scaffold1315	62358	0.2889	2	91.253	Hemiptera	3297	0
scaffold1314	62366	0.3082	0	113.865	no-hit	0	None
scaffold1313	62447	0.2615	0	61.167	Hemiptera	6362	0
scaffold2015	62514	0.2881	4977	110.392	Hemiptera	10848	0
scaffold1312	62550	0.274	0	73.355	Hemiptera	10472	0
scaffold1311	62589	0.2944	4	78.16	Hemiptera	4905	0
scaffold1310	62607	0.2608	0	59.492	Hemiptera	35084	0
scaffold1364	62681	0.2779	3	103.411	Hemiptera	8968	0
scaffold1309	62718	0.266	4	55.81	Hemiptera	760	0
scaffold1308	62822	0.2828	11	75.524	Hemiptera	30962	0
scaffold1322	62950	0.3269	2	125.871	no-hit	0	None
scaffold1307	63020	0.2363	4	42.379	Hemiptera	31464	1
scaffold1306	63071	0.2656	4	89.25	Hemiptera	2380	0
scaffold1305	63116	0.321	24	95.513	no-hit	0	None
scaffold1303	63242	0.2774	0	66.5	Hemiptera	13119	0
scaffold1540	63245	0.2953	21	211.465	Hemiptera	21525	0
scaffold1302	63256	0.248	0	49.367	Hemiptera	72021	0
scaffold1452	63310	0.2491	3226	50.475	Hemiptera	30893	1
scaffold1301	63316	0.2567	504	31.407	Hemiptera	24884	0
scaffold1299	63372	0.2721	0	84.322	Hemiptera	26708	0
scaffold1298	63440	0.2857	0	79.892	Hemiptera	2187	2
scaffold1410	63556	0.2931	281	135.989	Hemiptera	18823	2
scaffold1294	63709	0.3107	2	100.209	Hemiptera	4634	1
scaffold1293	63789	0.2243	0	32.288	Hemiptera	3041	0
scaffold1292	63850	0.2721	8	77.724	Hemiptera	40073	0
scaffold1290	64008	0.3124	2	108.659	Hemiptera	4477	1
scaffold1289	64047	0.2495	0	56.047	no-hit	0	None
scaffold1288	64067	0.2557	0	51.827	Hemiptera	59546	1
scaffold1287	64164	0.2673	24	72.601	Hemiptera	87105	0
scaffold1807	64179	0.2534	662	52.759	Hemiptera	21368	2
scaffold1658	64380	0.2504	179	59.997	Hemiptera	16883	1
scaffold1284	64486	0.2567	45	63.814	Hemiptera	22890	0
scaffold1283	64698	0.2621	11	57.141	Hemiptera	4613	1
scaffold1281	64727	0.2728	13	71.156	Hemiptera	13581	0
scaffold1280	64886	0.2536	312	66.884	Hemiptera	8961	0
scaffold1278	65003	0.2529	2	53.723	Hemiptera	47959	0
scaffold1276	65089	0.2735	6	79.665	Hemiptera	13247	0
scaffold1275	65161	0.3315	0	120.868	Hemiptera	36655	0
scaffold1274	65169	0.2693	0	64.139	Hemiptera	3324	1
scaffold1273	65183	0.2388	0	42.869	Hemiptera	46343	0
scaffold1270	65243	0.2567	21	55.35	Hemiptera	15964	0
scaffold1269	65305	0.2369	38	37.059	no-hit	0	None
scaffold1374	65338	0.2553	7	50.509	Hemiptera	11359	0
scaffold1268	65353	0.2625	147	52.26	Hemiptera	33012	0
scaffold1266	65500	0.2585	7	57.98	Hemiptera	61240	0
scaffold1265	65514	0.2796	2	95.799	Hemiptera	34657	0
scaffold1262	65678	0.2568	0	55.22	Hemiptera	88795	1
scaffold1261	65703	0.261	0	61.653	Hemiptera	13681	0
scaffold1260	65716	0.2401	0	50.114	Hemiptera	4207	0
scaffold1259	65744	0.3085	35	111.3	Hemiptera	29202	0
scaffold1258	65774	0.2685	14	63.657	Hemiptera	141	0
scaffold1422	65778	0.2672	204	110.437	Hemiptera	11034	2
scaffold1256	65855	0.272	0	78.494	Hemiptera	52779	1
scaffold1255	65856	0.3096	5	112.75	Hemiptera	2127	0
scaffold1254	66013	0.2688	0	66.309	Hemiptera	24960	0
scaffold1252	66238	0.2501	2	46.872	Hemiptera	4027	1
scaffold1251	66266	0.27	22	75.987	Hemiptera	96001	1
scaffold1250	66410	0.2647	133	99.835	Hemiptera	7622	2
scaffold1248	66705	0.2561	0	51.207	Hemiptera	47255	1
scaffold1245	67080	0.2482	41	46.855	Hemiptera	159	0
scaffold1244	67097	0.2442	2	52.373	Hemiptera	10401	0
scaffold1243	67117	0.2655	144	75.406	Hemiptera	8424	2
scaffold1242	67141	0.2579	21	61.668	Scleractinia	278	2
scaffold1239	67401	0.27	23	71.526	Hemiptera	11770	0
scaffold1277	67436	0.2624	22	53.564	Hemiptera	1767	0
scaffold1249	67684	0.2558	1	51.761	Hemiptera	23715	0
scaffold1237	67690	0.2614	0	66.846	Hemiptera	53416	0
scaffold1236	67756	0.2442	0	44.977	Hemiptera	47973	0
scaffold1235	67875	0.2788	6	94.009	Hemiptera	48932	17
scaffold1234	68063	0.2564	1	83.739	Hemiptera	36053	1
scaffold1233	68197	0.3087	2	90.432	no-hit	0	None
scaffold1300	68306	0.3162	4	142.421	Hemiptera	27899	0
scaffold1231	68486	0.2914	11	88.024	Hemiptera	398	0
scaffold1241	68527	0.2397	13	38.939	Hemiptera	13494	1
scaffold1229	68776	0.2444	17	41.672	Hemiptera	912	0
scaffold1228	68819	0.2484	0	51.108	Hemiptera	18533	2
scaffold1227	68946	0.2784	4	97.668	Hemiptera	30245	3
scaffold1226	68973	0.2694	4	69.508	Hemiptera	11920	2
scaffold1225	68974	0.2681	9	69.905	Hemiptera	812	0
scaffold1224	69057	0.2605	1	56.922	Hemiptera	612	0
scaffold1223	69074	0.2509	51	56.951	Hemiptera	10326	0
scaffold1222	69094	0.2882	17	91.274	Hemiptera	2492	0
scaffold1220	69204	0.3041	13	110.04	Hemiptera	530	0
scaffold1219	69219	0.2409	46	45.054	Hemiptera	4304	0
scaffold1217	69345	0.2799	6	76.088	Hemiptera	715	0
scaffold1216	69388	0.2599	0	61.039	Hemiptera	9026	0
scaffold1215	69438	0.2594	2	56.813	Hemiptera	27963	0
scaffold1214	69542	0.2334	33	42.091	Hemiptera	1505	0
scaffold1212	69607	0.2746	0	64.779	Hemiptera	8820	1
scaffold1211	69642	0.2915	5	74.812	Hemiptera	8341	0
scaffold1253	69738	0.2637	3	66.502	Hemiptera	10589	0
scaffold1210	69822	0.2601	7	60.678	Hemiptera	30778	0
scaffold1643	69834	0.2906	291	85.452	Hemiptera	22236	1
scaffold1209	70032	0.2509	1	52.734	Hemiptera	68879	0
scaffold1208	70116	0.2628	14	58.124	Hemiptera	1227	0
scaffold1205	70223	0.2646	9	62.704	Hemiptera	59516	4
scaffold1204	70332	0.2828	17	81.618	Hemiptera	124156	0
scaffold1203	70391	0.3046	92	102.499	Hemiptera	23176	0
scaffold1200	70681	0.2712	15	59.303	Hemiptera	37082	1
scaffold1199	70683	0.2735	0	83.978	Hemiptera	39757	2
scaffold1198	70883	0.2796	4	78.52	Hemiptera	129840	0
scaffold1240	71002	0.3142	6	116.089	Hemiptera	14719	0
scaffold1213	71044	0.2553	12	51.185	Hemiptera	16221	0
scaffold1194	71151	0.3001	2	84.714	Hemiptera	13282	3
scaffold1193	71174	0.2403	0	40.981	Hemiptera	11216	0
scaffold1192	71193	0.2673	0	64.967	Hemiptera	9436	0
scaffold1191	71227	0.271	2	45.23	Hemiptera	31506	0
scaffold1326	71271	0.2574	17	61.594	Hemiptera	17247	0
scaffold1190	71289	0.2939	2	102.113	no-hit	0	None
scaffold1189	71334	0.2644	0	66.485	Hemiptera	56273	0
scaffold1188	71415	0.2695	2	116.478	Hemiptera	7788	0
scaffold1187	71431	0.2533	5	53.157	Hemiptera	73496	4
scaffold1296	71974	0.2678	133	232.11	Hemiptera	23641	0
scaffold1218	72056	0.2744	5	74.572	Hemiptera	47808	0
scaffold1184	72058	0.2728	0	72.877	Hemiptera	10536	0
scaffold1183	72140	0.2989	0	103.435	Hemiptera	26648	0
scaffold1182	72232	0.2821	16	90.158	Hemiptera	67783	1
scaffold1507	72458	0.261	1	65.249	Hemiptera	8948	0
scaffold1370	72633	0.2585	920	61.376	Hemiptera	2448	0
scaffold1180	72639	0.2592	37	61.711	Hemiptera	11799	0
scaffold1179	72675	0.2579	2	66.991	Hemiptera	7004	0
scaffold1178	72763	0.2725	4	84.099	Hemiptera	23548	0
scaffold1177	72767	0.2569	329	82.143	Hemiptera	1569	0
scaffold1176	72822	0.2619	1	56.722	Hemiptera	12034	0
scaffold1175	72916	0.2622	427	54.803	Hemiptera	46767	0
scaffold1544	72943	0.2732	1	68.537	Hemiptera	9673	0
scaffold1173	73161	0.2642	0	57.141	Hemiptera	21931	0
scaffold1171	73337	0.2561	3	87.614	Hemiptera	859	0
scaffold1170	73413	0.2686	19	92.014	Hemiptera	24542	0
scaffold1169	73505	0.2541	3	60.707	Hemiptera	3242	0
scaffold1448	73664	0.2726	20	131.073	Hemiptera	13818	0
scaffold1185	73683	0.283	2	102.922	Hemiptera	11471	2
scaffold1201	73890	0.307	2	1290.27	Hemiptera	6257	0
scaffold1166	74147	0.3377	72	130.369	Hemiptera	4443	0
scaffold1324	74158	0.2571	62	71.18	Hemiptera	44081	0
scaffold1393	74273	0.2824	158	85.816	Hemiptera	44537	1
scaffold1164	74309	0.269	1	71.237	Hemiptera	27809	0
scaffold1162	74412	0.2694	21	62.018	no-hit	0	None
scaffold1161	74432	0.2937	23	91.909	Hemiptera	36326	1
scaffold1160	74657	0.2537	0	50.066	Hemiptera	11243	1
scaffold1157	74916	0.2739	0	57.904	no-hit	0	None
scaffold1154	75143	0.2593	58	58.58	Hemiptera	11905	0
scaffold1153	75220	0.256	1	59.726	Hemiptera	66345	1
scaffold1151	75669	0.2903	0	81.111	Hemiptera	25306	0
scaffold1150	75720	0.2403	6	94.334	Hemiptera	51158	0
scaffold1149	75910	0.254	3	53.563	Hemiptera	44697	0
scaffold1148	76020	0.2688	10	68.163	Hemiptera	81378	3
scaffold1147	76079	0.2702	2	75	Hemiptera	23112	2
scaffold1146	76124	0.2632	22	58.328	Hemiptera	49645	1
scaffold1144	76243	0.2724	199	78.371	Hemiptera	93126	5
scaffold1143	76251	0.2702	8	70.059	Hemiptera	57185	2
scaffold1142	76331	0.2511	40	50.415	Hemiptera	15084	0
scaffold1140	76436	0.2733	0	72.415	Hemiptera	30987	0
scaffold1139	76526	0.2676	4	75.011	Hemiptera	73056	1
scaffold1138	76608	0.2804	13	81.675	Hemiptera	24949	0
scaffold1136	76632	0.2444	144	49.292	Hemiptera	15602	0
scaffold1133	76913	0.2888	23	92.205	Hemiptera	16328	0
scaffold1509	76975	0.2646	19	65.848	Hemiptera	11336	1
scaffold1132	77053	0.2838	0	78.439	Hemiptera	36760	1
scaffold1155	77091	0.2557	0	55.918	Hemiptera	2197	0
scaffold1131	77146	0.2661	15	63.263	Hemiptera	43820	0
scaffold1355	77173	0.2426	30	45.75	Hemiptera	3174	0
scaffold1129	77303	0.2631	0	69.847	Hemiptera	77659	1
scaffold1127	77372	0.2866	0	87.295	Hemiptera	21065	0
scaffold1126	77545	0.2689	15	74.534	Hemiptera	730	0
scaffold1125	77802	0.2823	17	62.326	Hemiptera	2440	0
scaffold1124	77838	0.2657	10	70.741	Hemiptera	31770	0
scaffold1123	77969	0.2746	3	78.951	Hemiptera	61731	0
scaffold1159	77985	0.2586	205	55.959	Hemiptera	9677	0
scaffold1167	77995	0.3093	1	103.93	Hemiptera	18198	0
scaffold1122	78007	0.257	7	56.822	Hemiptera	88596	2
scaffold1120	78095	0.2904	0	97.666	Hemiptera	12844	0
scaffold1119	78275	0.2868	2	84.644	Hemiptera	100273	1
scaffold1246	78350	0.2785	23	76.146	Hemiptera	13782	0
scaffold1163	78376	0.2529	41	55.569	Hemiptera	31369	0
scaffold1115	78649	0.3105	2	135.821	Hemiptera	57870	0
scaffold1114	78736	0.2588	22	63.027	Hemiptera	21623	0
scaffold1113	78784	0.3028	18	107.713	Hemiptera	17299	0
scaffold1134	78874	0.297	0	97.424	Hemiptera	40832	0
scaffold1111	78914	0.272	2	70.029	Hemiptera	74317	0
scaffold1109	78969	0.2353	37	46.276	no-hit	0	None
scaffold1108	78994	0.2527	5	50.188	Hemiptera	70540	0
scaffold1107	79014	0.265	0	65.601	no-hit	0	None
scaffold1106	79067	0.2509	35	53.903	Hemiptera	1091	0
scaffold1105	79122	0.2867	0	89.422	Hemiptera	32346	0
scaffold1103	79201	0.2602	3	72.858	Hemiptera	590	0
scaffold1102	79251	0.2517	1	51.109	Hemiptera	7412	0
scaffold1101	79274	0.2572	9	62.654	Hemiptera	85381	2
scaffold1100	79351	0.2523	1	53.25	Hemiptera	14439	0
scaffold1099	79359	0.2851	4	87.225	Hemiptera	14775	1
scaffold1098	79387	0.2536	63	56.24	Hemiptera	196	0
scaffold1097	79432	0.2835	2194	47.036	Hemiptera	28300	0
scaffold1195	79460	0.2712	5	64.327	Hemiptera	9298	0
scaffold1096	79464	0.2441	60	40.254	Hemiptera	696	1
scaffold1257	79535	0.3208	191	103.481	Hemiptera	5069	2
scaffold1118	79568	0.2645	16	72.273	Hemiptera	45172	1
scaffold1095	79659	0.2681	2	68.595	Hemiptera	752	0
scaffold1400	79724	0.2637	24	64.507	Hemiptera	70319	0
scaffold1094	79728	0.269	0	72.157	Hemiptera	13758	0
scaffold1093	79749	0.2889	1	94.03	Hemiptera	82448	0
scaffold1555	79812	0.2907	12	101.223	Hemiptera	32339	0
scaffold1130	79831	0.2646	12	62.137	Hemiptera	35977	1
scaffold1092	79849	0.2662	0	73.212	Hemiptera	22900	0
scaffold1091	79867	0.3233	19	111.972	Hemiptera	20501	0
scaffold1090	79899	0.2752	0	75.164	Hemiptera	28224	0
scaffold1089	79986	0.2713	21	75.267	Hemiptera	973	0
scaffold1088	80164	0.2768	0	67.834	Hemiptera	6218	0
scaffold1087	80190	0.2741	0	74.942	Hemiptera	77513	6
scaffold1086	80305	0.3333	0	127.791	Hemiptera	24451	4
scaffold1083	80631	0.2724	0	72.429	Hemiptera	24634	0
scaffold1081	80679	0.2472	5	48.968	Hemiptera	40046	0
scaffold1080	80736	0.2912	0	111.44	Hemiptera	17216	0
scaffold1079	80821	0.2476	33	48.545	Hemiptera	48908	1
scaffold1078	80913	0.2987	0	96.541	Hemiptera	15043	0
scaffold1238	81043	0.2589	116	73.499	Hemiptera	22084	0
scaffold1076	81271	0.3215	0	109.34	Hemiptera	519	1
scaffold1075	81274	0.2497	10	51.013	Hemiptera	26286	0
scaffold1074	81285	0.2494	4	51.65	Hemiptera	5416	2
scaffold1073	81308	0.2836	34	79.734	Hemiptera	70636	2
scaffold1072	81313	0.2783	0	81.103	Hemiptera	32226	6
scaffold1230	81354	0.2529	0	50.881	Hemiptera	70903	0
scaffold1070	81443	0.2469	2	56.591	Hemiptera	2878	0
scaffold1067	81880	0.256	7	56.375	Hemiptera	49438	0
scaffold1064	81951	0.2325	2	33.899	Hemiptera	233	0
scaffold1061	82003	0.304	97	141.187	Hemiptera	13003	0
scaffold1060	82186	0.2666	0	69.847	Hemiptera	8870	0
scaffold1059	82289	0.2553	2186	49.466	Hemiptera	10517	2
scaffold1058	82310	0.266	22	58.973	Hemiptera	55192	0
scaffold1057	82608	0.2601	2	63.991	Hemiptera	57953	0
scaffold1055	82721	0.2693	0	68.293	Hemiptera	56267	0
scaffold1053	82856	0.2492	0	47.481	Hemiptera	45351	0
scaffold1052	82968	0.2555	1	53.594	Hemiptera	26201	1
scaffold1066	83108	0.2659	0	73.623	Hemiptera	12412	1
scaffold1084	83120	0.2742	106	79.698	Hemiptera	22018	1
scaffold1196	83182	0.3178	11	120.074	Hemiptera	40255	1
scaffold1050	83306	0.254	20	377.512	Hemiptera	9335	0
scaffold1049	83410	0.2583	26	57.162	Hemiptera	37066	1
scaffold1048	83445	0.2624	0	65.73	Hemiptera	60282	0
scaffold1062	83499	0.3013	1091	71.383	no-hit	0	None
scaffold1047	83664	0.2587	3	56.151	Hemiptera	56753	3
scaffold1046	83756	0.2613	2	63.136	Hemiptera	308	0
scaffold1286	83778	0.2662	3	62.495	Hemiptera	4750	4
scaffold1165	83915	0.2744	4	82.215	Hemiptera	110475	1
scaffold1056	83955	0.2872	167	91.913	Hemiptera	32258	0
scaffold1044	84124	0.2835	0	99.502	Hemiptera	56173	0
scaffold1042	84201	0.265	5	66.482	Hemiptera	1782	0
scaffold1041	84237	0.2753	0	76.763	Hemiptera	30567	2
scaffold1039	84326	0.28	17	77.69	Hemiptera	9696	0
scaffold1282	84348	0.2729	1	86.035	Hemiptera	17453	1
scaffold1038	84444	0.2654	304	65.156	Hemiptera	95844	1
scaffold1037	84577	0.2907	2	107.355	Hemiptera	6310	0
scaffold1051	84584	0.3251	5	133.213	no-hit	0	None
scaffold1036	84675	0.2811	4	96.365	Hemiptera	66146	0
scaffold1035	84692	0.2653	7	63.203	Hemiptera	364	0
scaffold1034	84694	0.2268	24	33.586	Hemiptera	4368	0
scaffold1033	84704	0.296	2	88.838	Hemiptera	32826	1
scaffold1032	84716	0.3065	7	101.694	Hemiptera	1954	0
scaffold1207	85179	0.2484	230	53.626	Hemiptera	3730	0
scaffold1031	85341	0.2744	2	74.68	Hemiptera	38858	1
scaffold1029	85681	0.2724	7	74.817	Hemiptera	35137	1
scaffold1027	85830	0.2356	11	39.164	Hemiptera	4927	0
scaffold1026	85874	0.2739	2	75.421	Hemiptera	14806	0
scaffold1025	86139	0.2475	3	57.623	Hemiptera	78330	0
scaffold1024	86147	0.2598	133	66.586	Hemiptera	30594	1
scaffold1450	86360	0.2648	12	65.112	Hemiptera	66340	2
scaffold1023	86361	0.2559	9	58.062	Hemiptera	51399	0
scaffold1022	86366	0.2824	21	87.168	Hemiptera	21081	0
scaffold1104	86449	0.2977	1	95.179	Hemiptera	5904	0
scaffold1018	86832	0.291	162	92.39	Hemiptera	47938	0
scaffold1017	86952	0.2646	13	60.866	Hemiptera	20501	6
scaffold1016	86990	0.3118	8	98.386	Hemiptera	40737	1
scaffold1015	87109	0.3334	92	144.928	Hemiptera	39219	1
scaffold1014	87356	0.272	0	61.429	Hemiptera	1077	0
scaffold1013	87469	0.2622	111	50.201	Hemiptera	1620	0
scaffold1009	87883	0.2622	1	67.004	Hemiptera	712	0
scaffold1007	88238	0.2418	0	52.135	Hemiptera	18404	0
scaffold1006	88273	0.2555	20	61.041	Hemiptera	666	1
scaffold1005	88356	0.2696	209	60.959	Hemiptera	286	0
scaffold1004	88384	0.2603	65	63.833	Hemiptera	58288	0
scaffold1003	88444	0.3008	2	87.706	Hemiptera	18244	2
scaffold1002	88654	0.2379	75	43.785	Hemiptera	585	0
scaffold1000	88732	0.262	29	55.347	Hemiptera	31681	0
scaffold997	89011	0.2585	0	56.924	Hemiptera	2877	0
scaffold996	89058	0.2529	26	48	Hemiptera	87639	0
scaffold995	89345	0.2419	29	47.467	Hemiptera	31826	0
scaffold1110	89598	0.2706	3	75.012	Hemiptera	26811	0
scaffold993	89711	0.273	0	65.371	Hemiptera	4284	1
scaffold991	89834	0.2769	27	72.077	Hemiptera	44691	0
scaffold990	89843	0.263	0	71.329	Hemiptera	53662	0
scaffold989	89923	0.2682	0	61.828	Hemiptera	25021	0
scaffold988	89980	0.2601	1	59.163	Hemiptera	16249	0
scaffold986	90034	0.2564	25	51.846	Hemiptera	4638	0
scaffold1197	90144	0.2514	1	53.709	Hemiptera	19570	0
scaffold985	90505	0.2594	28	58.711	Hemiptera	165	0
scaffold983	90594	0.3135	30	112.788	Hemiptera	19738	1
scaffold982	90630	0.266	14	66.776	Hemiptera	58155	0
scaffold980	90821	0.2807	16	81.249	Hemiptera	18230	0
scaffold1085	90852	0.2589	1	87.757	Hemiptera	7528	0
scaffold1030	90861	0.2772	259	69.168	Hemiptera	28370	0
scaffold1158	90869	0.2473	177	42.194	Hemiptera	50758	0
scaffold979	90953	0.2536	2	54.076	Hemiptera	6725	0
scaffold978	90961	0.2713	0	72.924	Hemiptera	37865	1
scaffold977	91052	0.2536	0	59.785	Hemiptera	21786	0
scaffold1498	91082	0.2776	38	89.816	Hemiptera	18099	0
scaffold976	91091	0.2697	106	72.645	Hemiptera	33128	0
scaffold974	91388	0.3019	2	78.999	Hemiptera	1991	0
scaffold973	91469	0.2691	8	68.023	Hemiptera	36256	1
scaffold1264	91528	0.2915	2	96.766	Hemiptera	41284	0
scaffold972	91576	0.2709	3	61.843	Hemiptera	172	0
scaffold970	91867	0.2747	12	77.724	Hemiptera	79170	1
scaffold1082	92142	0.2776	15	81.9	Hemiptera	56414	3
scaffold969	92158	0.3037	29	86.901	Hemiptera	765	0
scaffold981	92217	0.245	10	36.404	Hemiptera	76171	1
scaffold966	92500	0.2745	4	75.977	Hemiptera	77855	0
scaffold964	92685	0.2526	518	64.837	Hemiptera	141	0
scaffold975	92798	0.2659	0	74.262	Hemiptera	72793	0
scaffold963	92881	0.2617	25	60.176	Hemiptera	103664	1
scaffold962	92919	0.2762	93	85.796	Hemiptera	44054	1
scaffold961	92924	0.275	4	81.805	Hemiptera	107344	0
scaffold960	92944	0.2856	16	80.441	Hemiptera	26908	0
scaffold1010	93161	0.2968	12	84.887	Hemiptera	7238	2
scaffold957	93419	0.267	1	66.321	Hemiptera	53723	1
scaffold955	93681	0.2635	27	67.621	Hemiptera	16353	0
scaffold1186	93694	0.2663	248	76.024	Hemiptera	158465	1
scaffold954	93893	0.2634	3	67.698	Hemiptera	64345	2
scaffold953	93909	0.2618	122	62.007	Hemiptera	12157	0
scaffold1071	94350	0.2752	334	71.916	Hemiptera	56756	1
scaffold1674	94381	0.2396	2	46.076	Hemiptera	3340	0
scaffold965	94433	0.2506	3	53.372	Hemiptera	82242	0
scaffold951	94595	0.2787	3	84.17	Hemiptera	42021	0
scaffold950	94664	0.2675	5	57.758	Hemiptera	53018	0
scaffold949	94708	0.2598	65	68.634	Hemiptera	15481	2
scaffold947	94853	0.2589	202	63.359	Hemiptera	176	0
scaffold946	95220	0.2869	0	81.809	Hemiptera	10195	2
scaffold945	95341	0.2672	5	76.577	Hemiptera	23588	0
scaffold944	95356	0.2827	1	69.95	Hemiptera	529	0
scaffold943	95427	0.2592	44	67.601	Hemiptera	50332	0
scaffold942	95444	0.2632	0	60.042	Hemiptera	21536	0
scaffold939	95616	0.2619	26	60.439	Hemiptera	80793	0
scaffold937	95920	0.2829	3	77.417	Hemiptera	44995	1
scaffold935	96006	0.2561	2	56.218	Hemiptera	10945	3
scaffold932	96519	0.2716	10	78.674	Hemiptera	89018	2
scaffold931	96547	0.2563	28	65.85	Hemiptera	14579	0
scaffold930	96574	0.2605	117	61.667	Hemiptera	93084	0
scaffold929	96940	0.2528	2289	49.682	Hemiptera	2515	0
scaffold1206	97339	0.3055	2	126.653	Hemiptera	79867	5
scaffold927	97410	0.2407	44	47.731	Hemiptera	4976	1
scaffold936	97441	0.2793	55	73.277	Hemiptera	8520	1
scaffold1137	97580	0.2569	126	59.673	Hemiptera	100117	0
scaffold922	98292	0.2762	3	69.335	Hemiptera	25065	1
scaffold921	98492	0.2921	0	85.023	Hemiptera	2113	0
scaffold920	98568	0.241	4	96.821	Hemiptera	4341	1
scaffold919	98707	0.2439	11	50.554	Hemiptera	73258	0
scaffold918	98832	0.2586	2	55.483	Hemiptera	64841	0
scaffold956	99171	0.2585	151	60.355	Hemiptera	6494	1
scaffold928	99408	0.2759	58	67.275	Hemiptera	3818	1
scaffold915	99433	0.2842	8	82.3	Hemiptera	50609	0
scaffold913	99580	0.2717	8	70.541	Hemiptera	41778	0
scaffold999	99713	0.2695	22	71.267	Hemiptera	83706	0
scaffold911	99971	0.265	4	62.79	Hemiptera	28486	0
scaffold7561	3000	0.2373	0	27.931	no-hit	0	None
scaffold7564	3000	0.287	0	7.345	no-hit	0	None
scaffold7553	3001	0.3032	0	7.052	no-hit	0	None
scaffold7554	3001	0.2882	0	21.918	no-hit	0	None
scaffold7557	3001	0.3062	0	7.51	no-hit	0	None
scaffold7560	3001	0.3176	0	25.767	no-hit	0	None
scaffold7545	3002	0.3215	0	11.91	no-hit	0	None
scaffold7549	3002	0.2582	0	53.169	no-hit	0	None
scaffold7550	3002	0.459	0	0.125	Diptera	1350	1
scaffold7551	3002	0.2825	0	6.683	no-hit	0	None
scaffold7552	3002	0.2665	0	6.678	no-hit	0	None
scaffold7541	3003	0.31	0	8.217	no-hit	0	None
scaffold7535	3004	0.2906	0	10.859	no-hit	0	None
scaffold7536	3004	0.2919	0	13.381	no-hit	0	None
scaffold7537	3004	0.2796	0	7.289	no-hit	0	None
scaffold23951	3004	0.2349	92	23.313	no-hit	0	None
scaffold7530	3005	0.3451	0	33.043	no-hit	0	None
scaffold7532	3005	0.2982	0	7.093	no-hit	0	None
scaffold7533	3005	0.5361	0	0.567	no-hit	0	None
scaffold7523	3006	0.34	0	19.768	no-hit	0	None
scaffold7528	3006	0.3283	0	197.099	Hemiptera	172	0
scaffold7520	3007	0.281	0	20.879	no-hit	0	None
scaffold7514	3008	0.2789	0	6.895	no-hit	0	None
scaffold7509	3009	0.3177	0	15.68	no-hit	0	None
scaffold7510	3009	0.2722	0	6.075	no-hit	0	None
scaffold7511	3009	0.2788	0	19.273	no-hit	0	None
scaffold33946	3010	0.2761	0	102.783	no-hit	0	None
scaffold7503	3011	0.2959	0	63.037	no-hit	0	None
scaffold7505	3011	0.3245	0	7.291	no-hit	0	None
scaffold7497	3012	0.3091	0	7.755	no-hit	0	None
scaffold7482	3013	0.2887	0	103.986	Hemiptera	3960	0
scaffold7484	3013	0.2672	0	6.998	Hymenoptera	4576	0
scaffold7486	3013	0.3113	0	13.666	no-hit	0	None
scaffold7488	3013	0.306	0	9.533	Hymenoptera	330	1
scaffold7489	3013	0.2884	0	7.297	no-hit	0	None
scaffold7490	3013	0.2881	0	32.884	no-hit	0	None
scaffold7493	3013	0.3631	0	12.064	no-hit	0	None
scaffold7479	3014	0.3142	0	10.121	no-hit	0	None
scaffold7480	3014	0.2837	0	16.456	no-hit	0	None
scaffold7481	3014	0.3643	0	10.491	no-hit	0	None
scaffold7475	3016	0.2719	0	5.781	no-hit	0	None
scaffold7468	3017	0.2628	0	7.791	Hymenoptera	2925	0
scaffold7471	3017	0.2688	0	1114.37	no-hit	0	None
scaffold7473	3017	0.292	0	8.973	no-hit	0	None
scaffold29559	3017	0.2838	1	52.457	no-hit	0	None
scaffold27990	3018	0.3356	107	8.55	no-hit	0	None
scaffold7455	3020	0.2781	0	26.355	no-hit	0	None
scaffold7451	3021	0.2731	0	9.429	Hymenoptera	1130	0
scaffold7452	3021	0.4879	0	0.084	no-hit	0	None
scaffold27755	3021	0.2715	1	13.103	no-hit	0	None
scaffold7447	3022	0.4689	0	24.36	no-hit	0	None
scaffold7440	3023	0.5749	0	0.325	no-hit	0	None
scaffold7441	3023	0.2355	0	51.568	no-hit	0	None
scaffold7443	3023	0.3325	0	50.279	no-hit	0	None
scaffold7435	3024	0.2821	0	8.058	Hymenoptera	8065	0
scaffold7439	3024	0.5033	0	0.37	no-hit	0	None
scaffold7430	3025	0.3755	0	8.019	no-hit	0	None
scaffold30291	3025	0.2754	0	8.767	no-hit	0	None
scaffold7426	3026	0.3817	0	88.083	no-hit	0	None
scaffold7419	3027	0.2735	0	94.171	no-hit	0	None
scaffold7420	3027	0.3019	0	10.427	Hymenoptera	11528	0
scaffold7421	3027	0.2844	0	7.103	Hymenoptera	7108	0
scaffold25186	3027	0.2776	1	348.171	Hemiptera	6624	0
scaffold7408	3029	0.2852	0	7.421	no-hit	0	None
scaffold19903	3029	0.3253	1	36.959	no-hit	0	None
scaffold7403	3030	0.2815	0	23.307	no-hit	0	None
scaffold7404	3030	0.3053	0	8.105	Hymenoptera	6208	0
scaffold20438	3031	0.2881	1	60.365	no-hit	0	None
scaffold7388	3032	0.3044	0	17.555	no-hit	0	None
scaffold7383	3034	0.3754	0	19.791	Hymenoptera	3244	0
scaffold7374	3035	0.5377	0	0.3	Hemiptera	684	0
scaffold7376	3035	0.2992	0	8.618	no-hit	0	None
scaffold7377	3035	0.6343	0	14.325	no-hit	0	None
scaffold7380	3035	0.3288	0	7.381	no-hit	0	None
scaffold7373	3036	0.305	0	22.507	no-hit	0	None
scaffold7365	3038	0.2798	0	7.143	no-hit	0	None
scaffold7364	3039	0.2754	0	75.906	Hemiptera	965	0
scaffold7360	3040	0.7069	0	1.8	Pseudomonadales	705	0
scaffold7357	3041	0.3259	0	10.189	no-hit	0	None
scaffold7358	3041	0.3078	0	11.072	Hymenoptera	7710	0
scaffold7359	3041	0.3555	0	40.876	no-hit	0	None
scaffold31420	3041	0.2973	0	13.192	no-hit	0	None
scaffold7355	3042	0.2627	0	53.242	Hemiptera	1325	0
scaffold7351	3044	0.297	0	28.221	no-hit	0	None
scaffold7345	3045	0.3077	0	8.624	no-hit	0	None
scaffold31439	3045	0.5575	1	8.011	no-hit	0	None
scaffold7341	3046	0.3506	0	10.565	Hymenoptera	13192	1
scaffold7333	3047	0.2898	0	8.601	no-hit	0	None
scaffold7334	3047	0.2908	0	12.407	no-hit	0	None
scaffold7328	3048	0.2822	0	46.636	Hymenoptera	5084	0
scaffold7330	3048	0.2844	0	8.178	no-hit	0	None
scaffold7321	3049	0.5966	0	0.098	no-hit	0	None
scaffold7325	3049	0.3014	0	13.81	no-hit	0	None
scaffold7326	3049	0.2863	0	13.414	Hymenoptera	2230	0
scaffold7327	3049	0.285	0	7.954	Hymenoptera	1117	0
scaffold7319	3050	0.277	0	17.193	no-hit	0	None
scaffold7320	3050	0.3948	0	13.072	no-hit	0	None
scaffold7314	3051	0.3061	0	15.06	no-hit	0	None
scaffold7302	3052	0.2667	0	9.356	no-hit	0	None
scaffold22566	3052	0.2707	1	22.26	no-hit	0	None
scaffold31926	3052	0.288	45	107.302	no-hit	0	None
scaffold7294	3053	0.2968	0	39.364	no-hit	0	None
scaffold7295	3053	0.3767	0	323.041	Hemiptera	821	0
scaffold7296	3053	0.2912	0	8.371	no-hit	0	None
scaffold7298	3053	0.3282	0	7.075	no-hit	0	None
scaffold7292	3055	0.2975	0	13.615	no-hit	0	None
scaffold7286	3056	0.3331	0	11.404	no-hit	0	None
scaffold7281	3057	0.3641	0	7.439	no-hit	0	None
scaffold7282	3057	0.5214	0	0.833	no-hit	0	None
scaffold7276	3058	0.4133	0	17.174	no-hit	0	None
scaffold17238	3058	0.2895	1	32.316	no-hit	0	None
scaffold41065	3058	0.2901	311	38.296	no-hit	0	None
scaffold7272	3059	0.5211	0	5.473	no-hit	0	None
scaffold7274	3059	0.3269	0	14.215	no-hit	0	None
scaffold7264	3060	0.2647	0	6.693	no-hit	0	None
scaffold7265	3060	0.5977	0	15.179	no-hit	0	None
scaffold7269	3060	0.3	0	11.257	Hymenoptera	595	0
scaffold7271	3060	0.2516	0	9.134	no-hit	0	None
scaffold7262	3061	0.3117	0	9.852	Hymenoptera	1480	1
scaffold27034	3061	0.219	1	366.458	no-hit	0	None
scaffold7254	3063	0.3	0	13.785	no-hit	0	None
scaffold7242	3065	0.3197	0	9.377	Hymenoptera	22373	4
scaffold7244	3065	0.3615	0	9.547	Hymenoptera	3622	0
scaffold7240	3066	0.3738	0	11.835	no-hit	0	None
scaffold7236	3067	0.2781	0	6.953	Hymenoptera	8420	1
scaffold7237	3067	0.2856	0	7.463	no-hit	0	None
scaffold7238	3067	0.5057	0	0.401	no-hit	0	None
scaffold7230	3068	0.3357	0	16.376	Hymenoptera	246	0
scaffold37009	3068	0.2637	247	8.239	no-hit	0	None
scaffold7222	3069	0.2493	0	55.861	no-hit	0	None
scaffold7223	3069	0.4581	0	16.337	no-hit	0	None
scaffold7226	3069	0.3434	0	16.669	no-hit	0	None
scaffold7227	3069	0.3001	0	8.252	no-hit	0	None
scaffold7217	3070	0.5463	0	0.537	Hymenoptera	2159	1
scaffold7218	3070	0.2752	0	20.103	no-hit	0	None
scaffold7221	3070	0.3427	0	26.996	no-hit	0	None
scaffold7208	3071	0.281	0	9.018	no-hit	0	None
scaffold7211	3071	0.3243	0	13.124	no-hit	0	None
scaffold34561	3071	0.2669	261	20.886	no-hit	0	None
scaffold7206	3072	0.256	2	50.179	no-hit	0	None
scaffold7207	3072	0.5771	0	0.634	no-hit	0	None
scaffold21482	3072	0.4736	25	60.44	no-hit	0	None
scaffold36283	3072	0.2631	107	12.048	no-hit	0	None
scaffold7201	3073	0.2922	0	10.833	no-hit	0	None
scaffold7202	3073	0.2802	0	9.919	Hymenoptera	1738	0
scaffold7193	3074	0.4785	0	0.325	no-hit	0	None
scaffold7194	3074	0.325	0	11.899	no-hit	0	None
scaffold7195	3074	0.2694	0	8.725	no-hit	0	None
scaffold7196	3074	0.3097	0	7.229	no-hit	0	None
scaffold7197	3074	0.3405	2	10.126	no-hit	0	None
scaffold7198	3074	0.3142	0	11.317	no-hit	0	None
scaffold7199	3074	0.2682	2	11.606	no-hit	0	None
scaffold7190	3075	0.2878	0	8.34	no-hit	0	None
scaffold7192	3075	0.2826	0	7.015	no-hit	0	None
scaffold20975	3075	0.263	174	34.946	no-hit	0	None
scaffold7188	3076	0.3092	0	7.015	no-hit	0	None
scaffold7189	3076	0.3228	0	31.046	Hymenoptera	407	0
scaffold7183	3077	0.2964	0	15.002	no-hit	0	None
scaffold7180	3078	0.2463	0	46.667	no-hit	0	None
scaffold7181	3078	0.2891	0	8.134	Hymenoptera	12486	0
scaffold7177	3079	0.3267	0	8.422	no-hit	0	None
scaffold7178	3079	0.4807	0	0.413	no-hit	0	None
scaffold7169	3081	0.2645	0	37.454	no-hit	0	None
scaffold7171	3081	0.2707	0	27.464	no-hit	0	None
scaffold7161	3082	0.2761	0	5.956	Hymenoptera	14632	4
scaffold7163	3082	0.4192	0	15.571	no-hit	0	None
scaffold7165	3082	0.3085	45	202.313	Asterales	150	0
scaffold22309	3082	0.3191	17	40.509	no-hit	0	None
scaffold27647	3082	0.4301	1	5.198	no-hit	0	None
scaffold7157	3084	0.3197	0	9.516	no-hit	0	None
scaffold7159	3084	0.5136	0	6.291	no-hit	0	None
scaffold18404	3085	0.2863	1	102.28	no-hit	0	None
scaffold31650	3086	0.2467	350	56.076	no-hit	0	None
scaffold7152	3087	0.4765	0	0.795	no-hit	0	None
scaffold7148	3088	0.2691	0	5.996	no-hit	0	None
scaffold18849	3088	0.2813	73	9.026	no-hit	0	None
scaffold7145	3089	0.3309	0	28.87	no-hit	0	None
scaffold7140	3090	0.3618	0	16.262	no-hit	0	None
scaffold7141	3090	0.2634	0	5.682	Hymenoptera	5333	0
scaffold7143	3090	0.2822	0	10.245	no-hit	0	None
scaffold7133	3091	0.4047	0	11.031	no-hit	0	None
scaffold7134	3091	0.3604	0	26.787	no-hit	0	None
scaffold7136	3091	0.2873	0	20.168	no-hit	0	None
scaffold7139	3091	0.2756	0	6.681	no-hit	0	None
scaffold7125	3092	0.2125	0	10.891	no-hit	0	None
scaffold7127	3092	0.5527	0	0.314	no-hit	0	None
scaffold7123	3093	0.2929	0	9.625	no-hit	0	None
scaffold35146	3094	0.2996	177	7.008	Hymenoptera	2055	0
scaffold36916	3094	0.3499	333	38.36	no-hit	0	None
scaffold7115	3095	0.2753	0	476.079	Hemiptera	1510	0
scaffold7108	3097	0.3064	0	10.378	no-hit	0	None
scaffold7109	3097	0.5063	0	0.747	no-hit	0	None
scaffold7110	3097	0.2799	0	8.468	Hymenoptera	2425	0
scaffold7111	3097	0.2764	0	8.235	Hymenoptera	1219	1
scaffold7101	3098	0.2976	0	8.787	Hymenoptera	13814	0
scaffold29493	3098	0.3066	430	74.362	no-hit	0	None
scaffold7097	3100	0.5629	0	0.401	Hymenoptera	2524	0
scaffold7093	3101	0.456	0	0.098	no-hit	0	None
scaffold7094	3101	0.2502	0	27.929	no-hit	0	None
scaffold7095	3101	0.2548	0	6.896	Hymenoptera	930	0
scaffold21959	3101	0.2887	1	44.94	Hemiptera	145	0
scaffold7091	3102	0.2776	0	7.657	Hymenoptera	6926	0
scaffold7088	3103	0.3432	0	15.915	no-hit	0	None
scaffold33507	3103	0.5326	315	1.099	Asterales	132	0
scaffold7078	3105	0.3018	0	7.74	no-hit	0	None
scaffold7084	3105	0.3095	0	12.885	no-hit	0	None
scaffold18117	3105	0.3128	1	92.408	Hemiptera	1182	0
scaffold7071	3106	0.312	0	8.409	no-hit	0	None
scaffold7076	3106	0.3113	0	7.871	Hymenoptera	8554	2
scaffold7066	3108	0.5396	0	23.826	no-hit	0	None
scaffold7067	3108	0.305	0	13.284	no-hit	0	None
scaffold7054	3111	0.3198	0	37.177	no-hit	0	None
scaffold7055	3111	0.3192	0	9.925	no-hit	0	None
scaffold7046	3112	0.2571	0	153.288	Hemiptera	1370	0
scaffold7048	3112	0.3082	0	10.839	no-hit	0	None
scaffold7051	3112	0.2866	0	7.317	Coleoptera	507	0
scaffold7042	3113	0.5236	0	1.409	no-hit	0	None
scaffold7040	3114	0.2752	0	7.09	no-hit	0	None
scaffold7036	3116	0.2888	0	8.827	no-hit	0	None
scaffold7037	3116	0.4743	0	0.195	no-hit	0	None
scaffold24737	3116	0.2523	1	31.494	no-hit	0	None
scaffold7035	3117	0.452	0	11.957	no-hit	0	None
scaffold7030	3118	0.2789	13	36.969	no-hit	0	None
scaffold7031	3118	0.5417	0	0.043	no-hit	0	None
scaffold7032	3118	0.3063	0	11.388	no-hit	0	None
scaffold23604	3118	0.3324	22	23.843	no-hit	0	None
scaffold30848	3118	0.2646	0	47.811	no-hit	0	None
scaffold7029	3119	0.5274	0	0.272	Hymenoptera	849	0
scaffold7026	3120	0.3237	0	9.709	Hymenoptera	1525	0
scaffold21340	3120	0.2943	1	19.596	Hymenoptera	420	0
scaffold7011	3122	0.2783	0	153.353	no-hit	0	None
scaffold7013	3122	0.3043	0	10.725	no-hit	0	None
scaffold7014	3122	0.3136	0	8.663	Hymenoptera	5607	1
scaffold7001	3125	0.2877	0	12.442	no-hit	0	None
scaffold7002	3125	0.5331	0	0.282	no-hit	0	None
scaffold7004	3125	0.2842	0	15.206	no-hit	0	None
scaffold7000	3126	0.2681	0	10.031	Hymenoptera	4127	0
scaffold6993	3127	0.3249	0	21.457	no-hit	0	None
scaffold6994	3127	0.2833	0	193.384	Hemiptera	1008	0
scaffold6988	3128	0.3018	0	7.023	Hymenoptera	681	0
scaffold6989	3128	0.2826	0	12.971	no-hit	0	None
scaffold6991	3128	0.3085	0	13.901	no-hit	0	None
scaffold6984	3129	0.3257	0	74.44	no-hit	0	None
scaffold6977	3130	0.5559	0	0.549	Hymenoptera	3630	0
scaffold28444	3131	0.2744	52	180.243	no-hit	0	None
scaffold6975	3132	0.3244	0	10.795	no-hit	0	None
scaffold6965	3133	0.4692	0	0.327	no-hit	0	None
scaffold6966	3133	0.3166	0	53.877	no-hit	0	None
scaffold6962	3134	0.2626	0	6.136	Hymenoptera	2970	0
scaffold6959	3135	0.2778	0	11.519	no-hit	0	None
scaffold6960	3135	0.3136	0	21.755	no-hit	0	None
scaffold6949	3137	0.5024	0	0.063	no-hit	0	None
scaffold6945	3138	0.3145	0	9.268	no-hit	0	None
scaffold6947	3138	0.2999	0	51.641	no-hit	0	None
scaffold6944	3139	0.5483	0	0.474	no-hit	0	None
scaffold19873	3139	0.2817	1	112.661	no-hit	0	None
scaffold6935	3140	0.271	0	23.758	no-hit	0	None
scaffold6937	3140	0.4452	0	0.012	no-hit	0	None
scaffold6929	3141	0.3531	0	24.026	no-hit	0	None
scaffold6923	3143	0.3185	0	14.512	no-hit	0	None
scaffold6922	3144	0.348	0	10.17	no-hit	0	None
scaffold27926	3144	0.3012	196	8.821	no-hit	0	None
scaffold6920	3145	0.3447	0	14.098	no-hit	0	None
scaffold6911	3147	0.3346	0	13.073	Hymenoptera	840	0
scaffold6913	3147	0.2866	0	10.169	Hymenoptera	11134	0
scaffold6914	3147	0.442	0	74.997	no-hit	0	None
scaffold19253	3149	0.3139	1	50.434	no-hit	0	None
scaffold6904	3150	0.5905	0	0.563	Hymenoptera	915	0
scaffold6905	3150	0.3124	0	10.373	no-hit	0	None
scaffold6907	3150	0.2517	0	92.973	no-hit	0	None
scaffold6894	3152	0.3185	0	13.437	no-hit	0	None
scaffold6892	3153	0.5208	0	11.023	no-hit	0	None
scaffold6888	3154	0.2733	0	7.898	no-hit	0	None
scaffold6878	3157	0.3145	0	71.716	no-hit	0	None
scaffold6879	3157	0.2724	0	74.384	Garryales	1625	0
scaffold6882	3157	0.2955	0	16.411	no-hit	0	None
scaffold6875	3158	0.5383	0	0.328	Hymenoptera	2513	0
scaffold6871	3159	0.3099	0	8.389	no-hit	0	None
scaffold6863	3161	0.3053	0	52.058	no-hit	0	None
scaffold6861	3162	0.2998	0	10.119	no-hit	0	None
scaffold6856	3163	0.7401	0	10.347	Micrococcales	5122	0
scaffold6858	3163	0.295	0	11.557	Hymenoptera	8067	0
scaffold17458	3163	0.3432	7	26.105	no-hit	0	None
scaffold6852	3164	0.2879	0	6.649	no-hit	0	None
scaffold6842	3166	0.2757	0	6.784	no-hit	0	None
scaffold6845	3166	0.7296	0	13.923	no-hit	0	None
scaffold6846	3166	0.2574	0	6.288	Hymenoptera	165	0
scaffold6847	3166	0.3743	0	1500.29	Hemiptera	11652	0
scaffold6837	3167	0.2832	0	21.827	no-hit	0	None
scaffold60952	3167	0.2559	5	111.477	no-hit	0	None
scaffold6830	3168	0.2942	0	17.809	no-hit	0	None
scaffold6822	3169	0.3039	0	11.185	Hymenoptera	1481	0
scaffold6823	3169	0.5144	0	0.319	no-hit	0	None
scaffold6824	3169	0.3042	0	7.003	no-hit	0	None
scaffold6819	3170	0.2678	0	8.7	no-hit	0	None
scaffold6815	3171	0.3232	0	27.88	no-hit	0	None
scaffold6816	3171	0.24	0	7.859	no-hit	0	None
scaffold6818	3171	0.3425	0	42.195	no-hit	0	None
scaffold6812	3172	0.2569	0	5.286	no-hit	0	None
scaffold30280	3172	0.2878	73	30.939	no-hit	0	None
scaffold6807	3173	0.3082	0	13.582	no-hit	0	None
scaffold6800	3175	0.3587	0	7.898	no-hit	0	None
scaffold6801	3175	0.2778	0	60.232	Hemiptera	1549	0
scaffold6793	3176	0.3423	0	34.221	no-hit	0	None
scaffold6795	3176	0.3111	0	18.486	no-hit	0	None
scaffold6796	3176	0.2944	0	8.671	no-hit	0	None
scaffold6789	3177	0.3009	0	9.771	no-hit	0	None
scaffold6774	3181	0.2622	0	28.449	Hemiptera	2513	0
scaffold6775	3181	0.6501	0	0.807	no-hit	0	None
scaffold6763	3183	0.2944	0	14.133	no-hit	0	None
scaffold6766	3183	0.3239	0	16.674	no-hit	0	None
scaffold6760	3184	0.5192	0	0.345	no-hit	0	None
scaffold6761	3184	0.3244	0	65.422	Asterales	2568	1
scaffold6762	3184	0.2795	0	14.991	no-hit	0	None
scaffold24220	3184	0.2579	0	14.591	Hymenoptera	698	3
scaffold27787	3184	0.2833	0	47.327	no-hit	0	None
scaffold6757	3185	0.3363	0	12.579	Hymenoptera	618	0
scaffold6749	3187	0.2975	0	18.462	no-hit	0	None
scaffold26249	3187	0.3192	1	11.297	Hymenoptera	134	0
scaffold6743	3188	0.3585	0	110.351	no-hit	0	None
scaffold6745	3188	0.3614	0	9.678	Hymenoptera	1548	0
scaffold6740	3190	0.2912	0	9.007	no-hit	0	None
scaffold21270	3190	0.2599	173	32.642	no-hit	0	None
scaffold15790	3191	0.2589	0	25.322	no-hit	0	None
scaffold6730	3194	0.2668	0	6.646	no-hit	0	None
scaffold6726	3195	0.3111	0	6.44	no-hit	0	None
scaffold6727	3195	0.2873	0	8.446	Hymenoptera	3068	1
scaffold6722	3196	0.2697	0	7.413	no-hit	0	None
scaffold6723	3196	0.5031	0	7.288	no-hit	0	None
scaffold6716	3197	0.2828	0	7.647	no-hit	0	None
scaffold6719	3197	0.3165	0	10.154	Hymenoptera	11149	0
scaffold6720	3197	0.3137	0	7.486	no-hit	0	None
scaffold6714	3198	0.3455	0	11.022	Hymenoptera	557	0
scaffold23415	3198	0.3913	93	6.852	no-hit	0	None
scaffold22926	3199	0.5158	155	7.973	no-hit	0	None
scaffold6708	3200	0.315	0	10.56	no-hit	0	None
scaffold6709	3200	0.315	0	12.718	no-hit	0	None
scaffold6705	3201	0.3458	0	221.952	Hemiptera	3148	0
scaffold6700	3202	0.425	0	7.671	no-hit	0	None
scaffold6702	3202	0.3212	2	21.865	Hymenoptera	3301	0
scaffold6696	3203	0.2738	0	11.109	Hymenoptera	737	4
scaffold6697	3203	0.3472	0	9.242	no-hit	0	None
scaffold6692	3204	0.3208	0	8.61	no-hit	0	None
scaffold6694	3204	0.5705	0	8.002	Enterobacterales	20381	0
scaffold6689	3205	0.3289	0	28.514	no-hit	0	None
scaffold6687	3206	0.311	0	19.256	no-hit	0	None
scaffold6684	3207	0.3031	0	8.153	no-hit	0	None
scaffold6685	3207	0.2604	0	560.405	no-hit	0	None
scaffold6681	3208	0.2852	0	31.041	no-hit	0	None
scaffold6683	3208	0.2918	0	7.019	no-hit	0	None
scaffold6679	3209	0.5422	0	0.036	no-hit	0	None
scaffold6680	3209	0.3359	0	11.325	Hymenoptera	4895	0
scaffold29074	3210	0.2719	117	52.195	no-hit	0	None
scaffold6676	3211	0.5257	0	0.086	Hymenoptera	984	0
scaffold6668	3212	0.4072	0	44.108	no-hit	0	None
scaffold6667	3213	0.2742	0	59.332	Hemiptera	4264	0
scaffold6665	3214	0.2691	0	10.354	no-hit	0	None
scaffold6666	3214	0.3164	0	17.811	no-hit	0	None
scaffold27658	3214	0.3735	1	1.445	no-hit	0	None
scaffold6657	3216	0.2898	0	11.11	Hymenoptera	2472	0
scaffold6659	3216	0.2954	0	10.741	no-hit	0	None
scaffold6660	3216	0.542	0	0.345	no-hit	0	None
scaffold27970	3216	0.2273	308	16.335	Hemiptera	1185	0
scaffold6650	3217	0.3015	0	8.988	Hymenoptera	12495	0
scaffold6651	3217	0.3171	0	8.428	no-hit	0	None
scaffold6652	3217	0.2857	0	12.02	no-hit	0	None
scaffold6653	3217	0.2767	0	6.104	no-hit	0	None
scaffold6655	3217	0.2543	0	7.62	Hymenoptera	3654	0
scaffold6644	3218	0.2819	0	51.728	no-hit	0	None
scaffold6645	3218	0.3634	122	15.568	Hemiptera	1206	0
scaffold6646	3218	0.2648	0	36.453	no-hit	0	None
scaffold6639	3219	0.3075	0	13.814	no-hit	0	None
scaffold6640	3219	0.2637	0	6.13	no-hit	0	None
scaffold6636	3220	0.2932	0	17.548	no-hit	0	None
scaffold6635	3221	0.5306	0	0.471	no-hit	0	None
scaffold40941	3222	0.4239	422	6000.71	no-hit	0	None
scaffold6626	3223	0.3134	0	9.658	no-hit	0	None
scaffold6628	3223	0.3025	0	15.59	no-hit	0	None
scaffold6625	3224	0.4563	0	0.465	no-hit	0	None
scaffold6624	3225	0.3188	0	27.784	no-hit	0	None
scaffold6615	3227	0.2993	0	6.674	Hymenoptera	1575	0
scaffold6609	3228	0.5084	0	0.366	no-hit	0	None
scaffold6611	3228	0.316	0	9.538	Hymenoptera	1678	0
scaffold6608	3229	0.4909	0	0.346	no-hit	0	None
scaffold6599	3231	0.2909	0	14.586	no-hit	0	None
scaffold6600	3231	0.307	0	7.46	Hymenoptera	3885	0
scaffold6595	3232	0.5337	0	0.301	no-hit	0	None
scaffold6596	3232	0.2707	0	7.042	Hymenoptera	8418	0
scaffold29288	3232	0.428	43	1.947	no-hit	0	None
scaffold29386	3234	0.2744	169	39.026	no-hit	0	None
scaffold6583	3236	0.555	0	0.097	no-hit	0	None
scaffold6584	3236	0.271	0	7.05	Hymenoptera	1740	0
scaffold6585	3236	0.2855	0	25.732	no-hit	0	None
scaffold19657	3237	0.4855	1	3.93	no-hit	0	None
scaffold6579	3238	0.3107	0	12.822	no-hit	0	None
scaffold6582	3238	0.5732	0	0.526	no-hit	0	None
scaffold17974	3238	0.3102	1	668.804	Hemiptera	12523	0
scaffold6573	3239	0.2584	0	315.32	no-hit	0	None
scaffold6575	3239	0.3412	0	34.909	no-hit	0	None
scaffold6576	3239	0.3158	0	7.973	Hymenoptera	3554	0
scaffold6567	3241	0.2731	0	23.366	no-hit	0	None
scaffold6568	3241	0.3524	0	10.699	no-hit	0	None
scaffold6555	3243	0.3136	0	14.733	no-hit	0	None
scaffold6557	3243	0.5239	0	0.381	no-hit	0	None
scaffold6552	3244	0.2645	0	10.151	no-hit	0	None
scaffold6553	3244	0.2722	0	16.76	Hymenoptera	5415	0
scaffold6554	3244	0.2944	0	9.605	Hymenoptera	12270	0
scaffold23482	3244	0.2641	10	31.797	Hemiptera	2513	0
scaffold6547	3245	0.2576	0	6.794	no-hit	0	None
scaffold6548	3245	0.5553	0	5.85	no-hit	0	None
scaffold6551	3245	0.421	0	50.485	no-hit	0	None
scaffold25886	3245	0.2612	381	23.1	no-hit	0	None
scaffold6541	3247	0.4358	0	11.52	no-hit	0	None
scaffold6542	3247	0.2624	0	17.503	no-hit	0	None
scaffold6543	3247	0.2953	0	7.485	no-hit	0	None
scaffold6544	3247	0.3175	0	10.16	no-hit	0	None
scaffold6538	3248	0.3676	0	10.636	no-hit	0	None
scaffold6540	3248	0.3448	0	39.973	no-hit	0	None
scaffold6535	3249	0.3016	0	16.578	no-hit	0	None
scaffold6524	3252	0.2703	0	11.091	Hymenoptera	2414	1
scaffold15605	3252	0.2586	89	40.365	Hymenoptera	4225	0
scaffold6516	3254	0.2704	0	20.805	no-hit	0	None
scaffold6517	3254	0.2815	0	46.287	Hymenoptera	362	0
scaffold6519	3254	0.3215	0	9.638	Hymenoptera	1604	0
scaffold13134	3254	0.3049	0	29.792	no-hit	0	None
scaffold6514	3255	0.294	0	8.096	Hymenoptera	455	0
scaffold6515	3255	0.3401	0	160.784	Hemiptera	3530	0
scaffold6511	3256	0.3151	0	23.968	no-hit	0	None
scaffold6509	3257	0.3224	0	20.531	no-hit	0	None
scaffold6506	3258	0.3352	0	11.328	Hymenoptera	1341	1
scaffold6507	3258	0.5196	0	0.929	no-hit	0	None
scaffold6503	3259	0.3191	0	10.245	no-hit	0	None
scaffold6498	3260	0.285	0	6.501	Hymenoptera	5787	0
scaffold17898	3260	0.4354	1	121.093	no-hit	0	None
scaffold6496	3261	0.3385	0	17.774	no-hit	0	None
scaffold6497	3261	0.3309	0	9.373	no-hit	0	None
scaffold6488	3262	0.3047	0	10.337	no-hit	0	None
scaffold6490	3262	0.2817	0	10.08	Hymenoptera	14000	1
scaffold6493	3262	0.3299	0	23.097	no-hit	0	None
scaffold6494	3262	0.4286	0	0.679	no-hit	0	None
scaffold6495	3262	0.2995	0	6.914	no-hit	0	None
scaffold6487	3263	0.2945	0	6.635	Hymenoptera	15430	0
scaffold6481	3264	0.3514	0	14.65	no-hit	0	None
scaffold6483	3264	0.2963	0	6.713	no-hit	0	None
scaffold6484	3264	0.2966	0	8.467	Hymenoptera	3007	0
scaffold6479	3265	0.4573	24	51.052	no-hit	0	None
scaffold22362	3265	0.2586	5	425.802	no-hit	0	None
scaffold17996	3266	0.2685	0	208.7	Hemiptera	322	0
scaffold6474	3267	0.296	0	37.358	no-hit	0	None
scaffold6475	3267	0.2892	248	38.012	Hymenoptera	158	0
scaffold26465	3267	0.4484	0	1.74	no-hit	0	None
scaffold6469	3268	0.3277	0	8.659	no-hit	0	None
scaffold6466	3269	0.2958	0	6.678	Hymenoptera	342	0
scaffold6463	3270	0.2795	0	6.665	Hymenoptera	630	0
scaffold6457	3272	0.3007	0	9.576	Hymenoptera	8044	0
scaffold6460	3272	0.4694	0	0.072	no-hit	0	None
scaffold6454	3273	0.2667	0	8.341	no-hit	0	None
scaffold6455	3273	0.3171	0	6.467	Hymenoptera	771	2
scaffold6449	3274	0.3192	0	188.008	Hemiptera	404	0
scaffold6451	3274	0.3161	0	12.193	no-hit	0	None
scaffold6432	3279	0.3132	0	13.876	no-hit	0	None
scaffold6436	3279	0.3224	0	25.137	no-hit	0	None
scaffold6430	3281	0.2972	0	9.99	no-hit	0	None
scaffold6429	3282	0.2788	0	6.415	no-hit	0	None
scaffold19351	3282	0.2911	1	120.945	no-hit	0	None
scaffold6426	3283	0.4581	0	0.27	no-hit	0	None
scaffold6421	3284	0.3365	0	56.696	no-hit	0	None
scaffold6422	3284	0.3764	0	176.073	Hemiptera	1082	0
scaffold6425	3284	0.5837	0	0.99	no-hit	0	None
scaffold20352	3284	0.2257	1	88.428	no-hit	0	None
scaffold6417	3285	0.3114	0	16.776	no-hit	0	None
scaffold15111	3286	0.2909	0	25.226	no-hit	0	None
scaffold20108	3287	0.3515	314	83.01	no-hit	0	None
scaffold6408	3288	0.4687	0	37.766	no-hit	0	None
scaffold6409	3288	0.3218	0	11.018	no-hit	0	None
scaffold6410	3288	0.2722	0	7.423	Hymenoptera	2729	0
scaffold6412	3288	0.3619	0	36.061	no-hit	0	None
scaffold6413	3288	0.2914	0	7.468	Hymenoptera	11350	1
scaffold27813	3288	0.4161	178	0.181	no-hit	0	None
scaffold6404	3289	0.3123	0	9.69	no-hit	0	None
scaffold6407	3289	0.2806	0	17.408	no-hit	0	None
scaffold17302	3289	0.3157	58	92.951	no-hit	0	None
scaffold6402	3290	0.3392	0	18.32	no-hit	0	None
scaffold6403	3290	0.2199	2	52.631	no-hit	0	None
scaffold6398	3291	0.2999	0	15.524	no-hit	0	None
scaffold6399	3291	0.4667	0	76.387	no-hit	0	None
scaffold6400	3291	0.3014	0	10.374	Hymenoptera	2545	2
scaffold6392	3293	0.3289	0	39.964	no-hit	0	None
scaffold6393	3293	0.2666	0	17.471	no-hit	0	None
scaffold6391	3294	0.2765	155	75.689	no-hit	0	None
scaffold6386	3295	0.2777	0	62.453	no-hit	0	None
scaffold6382	3296	0.2588	0	42.613	no-hit	0	None
scaffold6383	3296	0.3158	0	8.059	no-hit	0	None
scaffold6384	3296	0.291	0	10.044	no-hit	0	None
scaffold6385	3296	0.2843	0	21.826	no-hit	0	None
scaffold6376	3298	0.3081	0	15.473	no-hit	0	None
scaffold12801	3298	0.242	0	16.192	no-hit	0	None
scaffold14761	3298	0.4889	1	1.668	no-hit	0	None
scaffold6373	3299	0.3016	0	26.732	no-hit	0	None
scaffold6370	3300	0.2914	61	282.579	no-hit	0	None
scaffold6371	3300	0.3167	0	22.488	no-hit	0	None
scaffold27341	3300	0.4833	194	4.395	no-hit	0	None
scaffold29692	3300	0.3097	119	143.906	no-hit	0	None
scaffold15014	3301	0.2876	1	86.412	no-hit	0	None
scaffold6360	3303	0.5662	0	0.506	no-hit	0	None
scaffold28851	3303	0.2468	118	14.67	no-hit	0	None
scaffold6351	3307	0.2912	0	7.388	no-hit	0	None
scaffold6346	3309	0.3025	0	34.086	no-hit	0	None
scaffold6347	3309	0.3004	0	7.775	no-hit	0	None
scaffold6343	3312	0.2959	0	20.96	no-hit	0	None
scaffold6344	3312	0.2962	0	7.585	Hymenoptera	213	0
scaffold6339	3313	0.5678	0	0.309	Hymenoptera	1503	0
scaffold6337	3314	0.3588	0	9.355	no-hit	0	None
scaffold6338	3314	0.326	16	54.108	Hemiptera	1005	0
scaffold6331	3316	0.323	0	81.029	Hemiptera	9578	0
scaffold20968	3318	0.3029	13	51.4	no-hit	0	None
scaffold6323	3320	0.3187	0	10.012	no-hit	0	None
scaffold6317	3321	0.3111	0	11.812	Hymenoptera	1000	0
scaffold6313	3322	0.3281	0	7.514	no-hit	0	None
scaffold6314	3322	0.2089	0	22.828	no-hit	0	None
scaffold19828	3322	0.3275	0	41.46	no-hit	0	None
scaffold6309	3323	0.316	0	8.992	Hymenoptera	1186	0
scaffold6303	3325	0.302	0	139.018	no-hit	0	None
scaffold6300	3326	0.2898	0	7.502	no-hit	0	None
scaffold6298	3327	0.2919	0	19.962	no-hit	0	None
scaffold6296	3328	0.3092	0	9.492	Hymenoptera	2508	0
scaffold6289	3329	0.4767	0	0.024	no-hit	0	None
scaffold6290	3329	0.2932	0	6.491	no-hit	0	None
scaffold27452	3329	0.3067	23	47.734	no-hit	0	None
scaffold6288	3330	0.5126	0	0.398	no-hit	0	None
scaffold6286	3331	0.3059	0	9.344	Hymenoptera	4204	0
scaffold6284	3332	0.3067	0	56.884	no-hit	0	None
scaffold6281	3333	0.2904	0	8.933	Hymenoptera	3264	1
scaffold6277	3335	0.3802	0	13.403	no-hit	0	None
scaffold6275	3336	0.2683	0	6.455	Hymenoptera	14319	1
scaffold6276	3336	0.4943	0	0.561	no-hit	0	None
scaffold6270	3338	0.278	0	12.303	no-hit	0	None
scaffold6271	3338	0.2855	0	7.847	Hymenoptera	6818	0
scaffold6262	3340	0.2668	0	10.563	Hymenoptera	3677	0
scaffold6269	3340	0.2575	0	50.67	no-hit	0	None
scaffold6261	3341	0.2909	0	19.973	Hymenoptera	11123	2
scaffold15602	3341	0.247	1	1017.64	no-hit	0	None
scaffold6258	3342	0.2708	0	6.732	no-hit	0	None
scaffold6247	3344	0.3101	0	9.174	Hymenoptera	8400	0
scaffold6248	3344	0.256	0	6.925	no-hit	0	None
scaffold6249	3344	0.3251	0	13.444	no-hit	0	None
scaffold6252	3344	0.3176	0	13.696	no-hit	0	None
scaffold6244	3346	0.275	0	12.134	no-hit	0	None
scaffold6239	3347	0.3077	0	9.042	Hymenoptera	8965	3
scaffold6238	3348	0.2625	0	5.838	Hymenoptera	413	0
scaffold13996	3348	0.2823	1	241.498	Hemiptera	1076	0
scaffold6232	3349	0.2711	0	12.567	Hymenoptera	246	1
scaffold6233	3349	0.2956	0	10.538	Hymenoptera	135	0
scaffold6235	3349	0.3156	0	15.997	no-hit	0	None
scaffold23608	3351	0.2901	1	6.734	no-hit	0	None
scaffold6223	3353	0.2714	0	5.788	Hymenoptera	2168	0
scaffold6224	3353	0.3495	0	9.947	no-hit	0	None
scaffold6218	3354	0.4946	0	0.109	no-hit	0	None
scaffold6219	3354	0.2895	0	377.518	Hemiptera	2262	0
scaffold6220	3354	0.2976	0	23.515	no-hit	0	None
scaffold6222	3354	0.3014	0	12.012	no-hit	0	None
scaffold13863	3356	0.3046	1	49.751	no-hit	0	None
scaffold17908	3356	0.3058	1	103.682	no-hit	0	None
scaffold6211	3357	0.2246	0	33.339	Hemiptera	1573	0
scaffold6206	3359	0.3388	0	11.304	no-hit	0	None
scaffold6199	3361	0.4133	0	12.975	no-hit	0	None
scaffold6192	3362	0.3013	0	10.794	no-hit	0	None
scaffold6193	3362	0.29	0	52.083	no-hit	0	None
scaffold6197	3362	0.3144	0	25.664	no-hit	0	None
scaffold6191	3363	0.4743	0	0.056	no-hit	0	None
scaffold6183	3365	0.3103	0	7.498	no-hit	0	None
scaffold6185	3365	0.3201	0	12.062	no-hit	0	None
scaffold6187	3365	0.3311	0	252.923	Hemiptera	3227	1
scaffold6179	3366	0.4694	0	0.253	no-hit	0	None
scaffold13784	3366	0.2704	1	12.557	no-hit	0	None
scaffold6170	3369	0.3552	2	8.565	no-hit	0	None
scaffold6172	3369	0.4785	0	0.168	no-hit	0	None
scaffold6168	3371	0.5396	0	0.374	no-hit	0	None
scaffold6164	3372	0.2699	0	6.842	no-hit	0	None
scaffold20250	3372	0.2504	1	25.158	no-hit	0	None
scaffold6161	3374	0.2635	0	12.733	no-hit	0	None
scaffold6163	3374	0.3097	0	7.73	Hymenoptera	3906	1
scaffold6160	3375	0.2581	0	8.204	no-hit	0	None
scaffold6156	3376	0.3531	0	13.763	no-hit	0	None
scaffold6157	3376	0.3015	0	13.435	no-hit	0	None
scaffold15525	3376	0.4336	117	1.695	no-hit	0	None
scaffold17735	3376	0.2344	1	63.517	no-hit	0	None
scaffold19306	3376	0.2978	1	48.345	no-hit	0	None
scaffold6152	3377	0.332	0	11.295	Hymenoptera	1224	0
scaffold6154	3377	0.292	0	6.26	Hymenoptera	606	0
scaffold6155	3377	0.3115	0	43.938	no-hit	0	None
scaffold6150	3378	0.2718	0	6.304	Hymenoptera	2090	0
scaffold6151	3378	0.2652	0	13.954	no-hit	0	None
scaffold6143	3381	0.2899	0	8.892	no-hit	0	None
scaffold6140	3382	0.3533	0	20.188	no-hit	0	None
scaffold6135	3383	0.3071	0	19.092	no-hit	0	None
scaffold12929	3384	0.4641	1	9.628	Hymenoptera	6468	7
scaffold6130	3385	0.2987	0	7.8	no-hit	0	None
scaffold6121	3387	0.532	0	0.203	no-hit	0	None
scaffold6124	3387	0.3632	0	19.661	no-hit	0	None
scaffold6118	3388	0.2509	0	40.532	no-hit	0	None
scaffold6115	3389	0.3078	0	13.506	no-hit	0	None
scaffold6116	3389	0.303	0	28.492	no-hit	0	None
scaffold6110	3391	0.2772	0	7.787	no-hit	0	None
scaffold6111	3391	0.2713	0	6.512	no-hit	0	None
scaffold6108	3392	0.3072	0	103.092	no-hit	0	None
scaffold6099	3393	0.3372	0	10.282	no-hit	0	None
scaffold6102	3393	0.2794	0	8.669	Hymenoptera	244	0
scaffold6103	3393	0.2885	0	7.979	Hymenoptera	7691	0
scaffold6104	3393	0.501	0	0.159	no-hit	0	None
scaffold6098	3394	0.2714	0	20.552	no-hit	0	None
scaffold6093	3395	0.3096	0	12.287	no-hit	0	None
scaffold14022	3396	0.3234	1	38.676	no-hit	0	None
scaffold6082	3398	0.5856	0	0.225	no-hit	0	None
scaffold6083	3398	0.2869	0	110.391	no-hit	0	None
scaffold6085	3398	0.3181	0	3163.36	Hemiptera	298	0
scaffold6076	3400	0.3735	0	9.435	no-hit	0	None
scaffold6079	3400	0.3215	0	15.631	no-hit	0	None
scaffold12500	3400	0.3007	31	21.573	no-hit	0	None
scaffold13056	3401	0.3115	66	137.822	no-hit	0	None
scaffold14947	3401	0.3166	66	88.934	no-hit	0	None
scaffold24886	3404	0.2528	121	49.926	no-hit	0	None
scaffold6069	3405	0.2981	0	9.814	Hymenoptera	7291	4
scaffold6063	3406	0.2713	0	7.827	no-hit	0	None
scaffold6064	3406	0.2777	0	49.694	Hymenoptera	1626	0
scaffold6060	3407	0.4544	0	0.27	no-hit	0	None
scaffold6061	3407	0.2601	39	8.987	no-hit	0	None
scaffold6049	3409	0.2798	0	7.006	Hymenoptera	10758	2
scaffold6046	3410	0.2704	0	6.279	Hymenoptera	4453	0
scaffold6044	3411	0.3169	0	12.09	no-hit	0	None
scaffold6039	3412	0.5044	0	0.354	no-hit	0	None
scaffold6040	3412	0.2799	0	8.477	Hymenoptera	3368	0
scaffold6041	3412	0.2989	0	8.486	no-hit	0	None
scaffold6038	3413	0.3314	0	20.347	no-hit	0	None
scaffold6036	3414	0.2841	0	104.077	Hemiptera	1387	0
scaffold25357	3414	0.2824	1	165.082	no-hit	0	None
scaffold6033	3415	0.5874	0	0.524	Hymenoptera	771	0
scaffold6029	3417	0.2921	0	9.384	no-hit	0	None
scaffold14311	3417	0.2879	124	46.999	no-hit	0	None
scaffold21447	3417	0.2772	1	24.046	no-hit	0	None
scaffold6028	3418	0.3054	0	13.712	no-hit	0	None
scaffold6025	3419	0.3372	0	35.638	no-hit	0	None
scaffold6023	3420	0.3225	0	7.861	no-hit	0	None
scaffold6024	3420	0.3257	0	22.913	no-hit	0	None
scaffold6020	3422	0.3279	0	14.095	no-hit	0	None
scaffold17463	3422	0.3692	1	10.48	no-hit	0	None
scaffold6012	3424	0.2751	0	18.903	no-hit	0	None
scaffold6010	3426	0.3079	0	110.368	Hemiptera	742	0
scaffold6008	3427	0.2997	0	54.355	no-hit	0	None
scaffold6002	3429	0.3249	0	14.456	no-hit	0	None
scaffold6005	3429	0.2625	0	61.312	no-hit	0	None
scaffold6000	3430	0.3636	0	36.807	no-hit	0	None
scaffold5995	3432	0.3805	0	21.129	no-hit	0	None
scaffold5996	3432	0.3147	0	18.043	Hymenoptera	20424	4
scaffold5990	3433	0.5424	0	0.129	no-hit	0	None
scaffold5991	3433	0.3367	0	20.218	no-hit	0	None
scaffold5992	3433	0.2447	0	39.156	no-hit	0	None
scaffold5993	3433	0.5272	0	0.359	Hymenoptera	6277	0
scaffold5987	3434	0.3037	0	7.287	Hymenoptera	704	0
scaffold5988	3434	0.2688	0	90.394	no-hit	0	None
scaffold5989	3434	0.3643	0	22.618	no-hit	0	None
scaffold5982	3436	0.3053	0	5.88	no-hit	0	None
scaffold5978	3438	0.3069	0	21.634	no-hit	0	None
scaffold5979	3438	0.4953	0	0.468	no-hit	0	None
scaffold5980	3438	0.2696	0	6.703	no-hit	0	None
scaffold5974	3439	0.289	0	8.153	Hymenoptera	3131	1
scaffold12375	3440	0.3225	1	33.785	no-hit	0	None
scaffold5967	3442	0.3475	0	13.44	no-hit	0	None
scaffold5962	3445	0.2816	0	7.949	Hymenoptera	19749	0
scaffold5959	3446	0.2446	0	46.867	Hemiptera	635	0
scaffold5957	3447	0.2791	0	6.416	Hymenoptera	5089	0
scaffold5958	3447	0.3206	0	9.546	no-hit	0	None
scaffold5952	3449	0.2873	0	7.147	Hymenoptera	6866	0
scaffold5946	3451	0.3423	77	28.639	no-hit	0	None
scaffold5941	3453	0.2928	0	10.978	no-hit	0	None
scaffold5943	3453	0.3154	0	15.687	no-hit	0	None
scaffold22911	3454	0.3909	118	70.637	no-hit	0	None
scaffold5938	3455	0.5007	0	0.088	no-hit	0	None
scaffold5928	3459	0.303	0	15.522	no-hit	0	None
scaffold5929	3459	0.318	0	17.12	no-hit	0	None
scaffold5927	3460	0.3318	0	14.461	no-hit	0	None
scaffold5924	3463	0.2844	0	17.697	no-hit	0	None
scaffold5917	3466	0.3953	0	9.091	no-hit	0	None
scaffold5916	3467	0.2781	0	86.309	Hemiptera	316	0
scaffold5913	3468	0.3725	0	242.363	Hemiptera	276	0
scaffold5908	3469	0.3315	0	10.915	no-hit	0	None
scaffold5909	3469	0.2759	0	135.559	no-hit	0	None
scaffold5906	3470	0.5951	0	0.962	no-hit	0	None
scaffold5904	3471	0.3094	0	9.697	no-hit	0	None
scaffold5905	3471	0.5736	0	0.321	no-hit	0	None
scaffold55193	3471	0.3113	272	97.168	no-hit	0	None
scaffold5903	3472	0.3021	0	8.721	Poales	896	0
scaffold5899	3473	0.5569	0	0.208	no-hit	0	None
scaffold13598	3474	0.2828	1	167.922	no-hit	0	None
scaffold5894	3475	0.3888	0	59.94	no-hit	0	None
scaffold5887	3477	0.3069	0	14.536	Hymenoptera	5525	0
scaffold5888	3477	0.4478	0	10.984	no-hit	0	None
scaffold5882	3479	0.3176	0	9.76	no-hit	0	None
scaffold18817	3479	0.3796	244	10.619	no-hit	0	None
scaffold5879	3480	0.3454	0	18.234	no-hit	0	None
scaffold5881	3480	0.2704	0	7.09	Hymenoptera	455	0
scaffold5877	3481	0.3094	0	10.44	Hymenoptera	1838	2
scaffold5870	3484	0.287	0	175.537	Hemiptera	340	0
scaffold5871	3484	0.3183	0	7.526	no-hit	0	None
scaffold5872	3484	0.3114	0	11.651	no-hit	0	None
scaffold17786	3484	0.3798	1	49.966	no-hit	0	None
scaffold5867	3485	0.3329	0	9.201	no-hit	0	None
scaffold5868	3485	0.2878	0	7.5	Hymenoptera	237	0
scaffold5866	3486	0.2963	0	8.024	no-hit	0	None
scaffold5861	3488	0.5722	0	0.56	Hymenoptera	1103	0
scaffold5862	3488	0.3159	0	21.034	no-hit	0	None
scaffold23214	3489	0.2732	1	6.374	Hymenoptera	3766	3
scaffold12387	3490	0.2961	1	154.232	no-hit	0	None
scaffold21820	3490	0.3285	1	87.712	Hemiptera	1005	0
scaffold5856	3491	0.2991	0	14.476	no-hit	0	None
scaffold5855	3492	0.3058	0	13.135	no-hit	0	None
scaffold5851	3493	0.3158	0	14.826	no-hit	0	None
scaffold5849	3494	0.5904	0	7.917	Xanthomonadales	3405	0
scaffold19257	3494	0.3425	180	75.03	no-hit	0	None
scaffold5842	3497	0.3117	0	8.979	no-hit	0	None
scaffold5843	3497	0.479	0	8.548	no-hit	0	None
scaffold15270	3498	0.2554	44	72.181	no-hit	0	None
scaffold5837	3499	0.3284	0	13.584	Hymenoptera	4945	0
scaffold5834	3500	0.2589	0	5.865	no-hit	0	None
scaffold5828	3502	0.2673	0	5.895	no-hit	0	None
scaffold5829	3502	0.2895	0	8.69	Hymenoptera	6496	2
scaffold5821	3503	0.3551	0	23.409	no-hit	0	None
scaffold5826	3503	0.4259	0	14.704	no-hit	0	None
scaffold5818	3504	0.3039	0	9.368	Hymenoptera	1100	0
scaffold5813	3506	0.2995	0	22.579	no-hit	0	None
scaffold20197	3506	0.2862	1	123.128	Hemiptera	422	0
scaffold5807	3507	0.2971	0	11.27	no-hit	0	None
scaffold5810	3507	0.3105	0	10.02	Hymenoptera	3908	0
scaffold5804	3509	0.2744	0	7.701	Hymenoptera	3710	0
scaffold5795	3513	0.3814	0	18.032	no-hit	0	None
scaffold5793	3514	0.2772	0	7.233	Hymenoptera	9352	0
scaffold5787	3516	0.2679	0	6.662	Hymenoptera	2800	2
scaffold5780	3517	0.2604	0	8.619	no-hit	0	None
scaffold5781	3517	0.2769	0	23.605	no-hit	0	None
scaffold5783	3517	0.3176	0	33.473	no-hit	0	None
scaffold16096	3517	0.2494	20	49.459	no-hit	0	None
scaffold5774	3521	0.3258	0	13.527	no-hit	0	None
scaffold5770	3522	0.253	0	50.809	no-hit	0	None
scaffold5772	3522	0.2601	0	66.277	Hemiptera	226	0
scaffold5768	3524	0.2869	0	8.691	Hymenoptera	6784	1
scaffold5762	3525	0.295	0	8.895	no-hit	0	None
scaffold5764	3525	0.3177	0	7.358	no-hit	0	None
scaffold14460	3527	0.3355	1	62.778	no-hit	0	None
scaffold5754	3528	0.3362	0	11.124	no-hit	0	None
scaffold5756	3528	0.3078	0	9.245	no-hit	0	None
scaffold5753	3529	0.2822	0	6.198	no-hit	0	None
scaffold5749	3530	0.2805	0	7.732	no-hit	0	None
scaffold5750	3530	0.3184	0	8.103	Hymenoptera	4136	1
scaffold5748	3531	0.3781	0	12.843	Hymenoptera	9949	0
scaffold5746	3532	0.3508	0	11.484	no-hit	0	None
scaffold16083	3533	0.3153	0	179.262	Hemiptera	169	0
scaffold13769	3534	0.2782	1	38.092	Hemiptera	220	0
scaffold5740	3535	0.2668	0	33.639	no-hit	0	None
scaffold5738	3536	0.3133	0	36.246	no-hit	0	None
scaffold5739	3536	0.2548	0	12.071	no-hit	0	None
scaffold5733	3538	0.307	0	10.933	Hymenoptera	11438	1
scaffold5735	3538	0.2993	0	7.436	Hemiptera	588	1
scaffold5723	3541	0.379	0	13.186	no-hit	0	None
scaffold5724	3541	0.2838	0	8.779	no-hit	0	None
scaffold5726	3541	0.3197	0	12.086	no-hit	0	None
scaffold16358	3541	0.3226	134	17.76	no-hit	0	None
scaffold5722	3542	0.5104	0	0.027	no-hit	0	None
scaffold5720	3544	0.2528	0	202.773	no-hit	0	None
scaffold5717	3545	0.2886	0	6.939	Hymenoptera	417	0
scaffold5718	3545	0.2395	0	54.466	no-hit	0	None
scaffold5719	3545	0.2855	0	6.819	Diptera	1102	1
scaffold5714	3546	0.3376	0	27.341	no-hit	0	None
scaffold5716	3546	0.2702	0	95.923	no-hit	0	None
scaffold5711	3547	0.3986	0	17.811	no-hit	0	None
scaffold5712	3547	0.3332	0	10.24	no-hit	0	None
scaffold10624	3547	0.4585	1	4.38	no-hit	0	None
scaffold16680	3547	0.349	0	68.326	no-hit	0	None
scaffold5710	3548	0.5479	0	0.336	no-hit	0	None
scaffold26448	3549	0.2832	375	94.342	no-hit	0	None
scaffold5705	3550	0.3211	0	7.993	no-hit	0	None
scaffold5703	3551	0.3284	0	16.409	Hymenoptera	6938	0
scaffold5704	3551	0.3053	0	11.969	no-hit	0	None
scaffold5699	3552	0.2728	0	33.727	Hemiptera	645	0
scaffold5701	3552	0.243	0	8.034	no-hit	0	None
scaffold5692	3554	0.3348	0	13.437	no-hit	0	None
scaffold5693	3554	0.2988	0	6.372	Hymenoptera	4120	0
scaffold5694	3554	0.334	0	45.097	no-hit	0	None
scaffold17738	3554	0.3279	1	31.813	no-hit	0	None
scaffold20056	3554	0.3369	1	110.78	Enterobacterales	2354	0
scaffold5690	3556	0.3003	0	7.218	Hymenoptera	1078	0
scaffold5689	3557	0.3019	0	32.704	no-hit	0	None
scaffold5686	3558	0.523	0	0.319	no-hit	0	None
scaffold5687	3558	0.5334	0	0.375	no-hit	0	None
scaffold5684	3559	0.2706	0	6.304	Hymenoptera	3027	0
scaffold5680	3560	0.2666	0	12.328	no-hit	0	None
scaffold17298	3561	0.3343	1	9.754	no-hit	0	None
scaffold5675	3562	0.2791	0	6.777	no-hit	0	None
scaffold5673	3563	0.3545	0	14.803	no-hit	0	None
scaffold5671	3565	0.3215	0	9.64	no-hit	0	None
scaffold5672	3565	0.3285	0	57.652	no-hit	0	None
scaffold11171	3568	0.3161	167	47.373	no-hit	0	None
scaffold5664	3569	0.3298	0	17.449	no-hit	0	None
scaffold5660	3570	0.3412	0	188.364	no-hit	0	None
scaffold5663	3570	0.2928	63	95.104	no-hit	0	None
scaffold5654	3571	0.2851	0	20.631	no-hit	0	None
scaffold5655	3571	0.2943	0	8.794	no-hit	0	None
scaffold5656	3571	0.2764	0	50.5	no-hit	0	None
scaffold5658	3571	0.3265	0	53.402	no-hit	0	None
scaffold21579	3575	0.3801	194	257.275	no-hit	0	None
scaffold5645	3579	0.3252	0	10.147	Hymenoptera	1214	0
scaffold5646	3579	0.2596	0	10.4	no-hit	0	None
scaffold5643	3580	0.5832	0	2.19	no-hit	0	None
scaffold5644	3580	0.3391	0	43.011	Hymenoptera	566	0
scaffold5639	3581	0.2617	0	40.993	no-hit	0	None
scaffold5640	3581	0.3072	0	7.609	no-hit	0	None
scaffold5641	3581	0.3027	0	7.059	no-hit	0	None
scaffold5636	3583	0.3087	0	43.178	no-hit	0	None
scaffold5635	3584	0.2799	0	10.81	no-hit	0	None
scaffold18349	3584	0.2559	1	20.207	Hymenoptera	2289	0
scaffold5631	3588	0.3046	0	36.613	Hymenoptera	6147	0
scaffold5625	3590	0.2688	0	11.185	no-hit	0	None
scaffold5626	3590	0.3437	0	23.352	no-hit	0	None
scaffold19055	3590	0.2981	1	69.188	Hymenoptera	139	0
scaffold5618	3594	0.3069	0	5.732	no-hit	0	None
scaffold5619	3594	0.3144	0	22.321	no-hit	0	None
scaffold21334	3594	0.2571	47	19.905	no-hit	0	None
scaffold5612	3596	0.2494	0	89.53	Hemiptera	1215	0
scaffold5613	3596	0.2581	0	6.39	Hymenoptera	1563	2
scaffold5611	3597	0.3292	0	41.466	no-hit	0	None
scaffold5607	3598	0.2821	0	15.747	no-hit	0	None
scaffold5608	3598	0.274	0	16.392	no-hit	0	None
scaffold5604	3599	0.3248	0	18.255	no-hit	0	None
scaffold17647	3599	0.2685	1	94.02	no-hit	0	None
scaffold5602	3600	0.2333	0	3587.12	Hemiptera	2632	0
scaffold5598	3603	0.2986	0	108.674	Asterales	289	0
scaffold5591	3604	0.5355	0	0.298	no-hit	0	None
scaffold5593	3604	0.3319	0	11.223	no-hit	0	None
scaffold5594	3604	0.2941	0	42.916	no-hit	0	None
scaffold5595	3604	0.2672	0	45.752	no-hit	0	None
scaffold5589	3605	0.3556	0	18.737	no-hit	0	None
scaffold5587	3606	0.31	0	14.712	no-hit	0	None
scaffold5585	3607	0.5453	0	1.419	no-hit	0	None
scaffold5586	3607	0.5786	0	16.984	no-hit	0	None
scaffold18443	3607	0.4354	1	70.072	no-hit	0	None
scaffold5578	3610	0.2867	0	7.298	no-hit	0	None
scaffold5580	3610	0.4787	0	0.032	no-hit	0	None
scaffold5577	3611	0.3572	0	10.882	no-hit	0	None
scaffold5576	3612	0.2738	0	8.905	Hymenoptera	10870	2
scaffold5574	3613	0.6277	0	33.066	no-hit	0	None
scaffold5572	3614	0.4272	0	21.007	no-hit	0	None
scaffold5570	3615	0.2772	0	7.09	no-hit	0	None
scaffold13670	3615	0.264	1	14.732	no-hit	0	None
scaffold5568	3617	0.3077	0	6.688	no-hit	0	None
scaffold5565	3619	0.2946	0	25.087	Hymenoptera	1478	0
scaffold5562	3621	0.3195	0	117.973	no-hit	0	None
scaffold5557	3623	0.5065	0	0.076	no-hit	0	None
scaffold14783	3623	0.3868	1	13.281	no-hit	0	None
scaffold5556	3624	0.2619	0	5.938	no-hit	0	None
scaffold5552	3626	0.3232	0	52.871	no-hit	0	None
scaffold5547	3628	0.315	0	8.118	no-hit	0	None
scaffold5548	3628	0.2721	0	23.229	no-hit	0	None
scaffold5540	3631	0.3118	0	124.488	Hemiptera	7205	0
scaffold5538	3632	0.3059	0	20.51	no-hit	0	None
scaffold5536	3633	0.3242	0	22.943	no-hit	0	None
scaffold5530	3635	0.2836	0	8.186	no-hit	0	None
scaffold5531	3635	0.329	0	11.053	no-hit	0	None
scaffold5523	3637	0.2725	0	102.57	no-hit	0	None
scaffold5524	3637	0.2725	0	8.798	Hymenoptera	2690	0
scaffold5520	3639	0.2743	0	162.157	no-hit	0	None
scaffold5516	3640	0.4401	0	0.136	no-hit	0	None
scaffold5513	3641	0.2573	0	6.885	Hymenoptera	9932	0
scaffold5511	3642	0.3278	0	11.023	no-hit	0	None
scaffold5512	3642	0.3814	0	15.716	no-hit	0	None
scaffold5508	3644	0.5727	0	0.345	no-hit	0	None
scaffold5503	3645	0.2801	0	14.931	no-hit	0	None
scaffold5505	3645	0.3547	0	8.622	no-hit	0	None
scaffold5500	3646	0.2872	0	10.657	no-hit	0	None
scaffold21451	3646	0.5317	1	0.252	no-hit	0	None
scaffold5498	3647	0.3576	0	42.894	no-hit	0	None
scaffold5499	3647	0.266	0	7.407	Hymenoptera	740	0
scaffold15066	3647	0.4028	0	62.662	no-hit	0	None
scaffold5496	3648	0.528	0	6.199	no-hit	0	None
scaffold21852	3648	0.3197	213	79.718	no-hit	0	None
scaffold5493	3649	0.3234	0	11.575	no-hit	0	None
scaffold5494	3649	0.3708	0	35.972	no-hit	0	None
scaffold5491	3650	0.3208	0	14.801	no-hit	0	None
scaffold25747	3650	0.2828	468	20.901	Diptera	887	5
scaffold5487	3651	0.3038	0	10.168	no-hit	0	None
scaffold14065	3652	0.3111	0	289.296	Hemiptera	158	0
scaffold5483	3653	0.5114	0	0.281	Hymenoptera	670	0
scaffold5481	3654	0.315	0	6.889	no-hit	0	None
scaffold5482	3654	0.532	0	0.249	no-hit	0	None
scaffold15124	3654	0.302	114	17.906	no-hit	0	None
scaffold5476	3656	0.2639	0	6.839	no-hit	0	None
scaffold5478	3656	0.34	0	17.891	no-hit	0	None
scaffold5472	3658	0.3231	0	8.048	no-hit	0	None
scaffold5469	3659	0.2711	0	7.69	Hymenoptera	4513	0
scaffold14600	3662	0.2863	1	218.804	no-hit	0	None
scaffold5461	3665	0.621	0	0.688	no-hit	0	None
scaffold5462	3665	0.2944	0	8.648	Hymenoptera	839	0
scaffold5459	3666	0.2529	0	8.24	no-hit	0	None
scaffold5457	3667	0.2574	0	6.915	no-hit	0	None
scaffold9703	3667	0.2524	42	17.295	no-hit	0	None
scaffold36361	3667	0.326	11	113.905	no-hit	0	None
scaffold5455	3668	0.2811	0	8.975	no-hit	0	None
scaffold18789	3668	0.3199	1	9.627	no-hit	0	None
scaffold5449	3671	0.3272	0	11.479	no-hit	0	None
scaffold5441	3672	0.28	0	11.544	no-hit	0	None
scaffold5442	3672	0.3524	0	228.13	Hemiptera	191	0
scaffold5432	3678	0.28	0	8.111	Hymenoptera	370	0
scaffold5433	3678	0.2939	0	8.968	Hymenoptera	686	0
scaffold5428	3679	0.2965	0	8.747	Hymenoptera	983	0
scaffold5431	3679	0.5246	0	0.053	no-hit	0	None
scaffold5423	3680	0.4234	0	100.185	no-hit	0	None
scaffold5425	3680	0.2731	0	7.473	no-hit	0	None
scaffold5427	3680	0.3	0	21.136	no-hit	0	None
scaffold5422	3681	0.2334	0	762.752	Hemiptera	1793	0
scaffold5417	3683	0.3049	0	6.298	no-hit	0	None
scaffold5413	3685	0.2923	0	8.029	no-hit	0	None
scaffold5408	3686	0.2621	0	20.893	no-hit	0	None
scaffold13664	3686	0.279	1	139.3	no-hit	0	None
scaffold5406	3688	0.5187	0	0.266	no-hit	0	None
scaffold23042	3688	0.2878	102	178.88	no-hit	0	None
scaffold5405	3689	0.2779	0	34.84	no-hit	0	None
scaffold5397	3693	0.368	0	8.141	no-hit	0	None
scaffold10399	3693	0.3098	104	15.817	no-hit	0	None
scaffold5394	3694	0.2924	0	23.164	no-hit	0	None
scaffold5392	3696	0.2876	0	6.433	no-hit	0	None
scaffold5391	3697	0.3308	0	14.47	no-hit	0	None
scaffold13757	3697	0.4736	230	4.953	no-hit	0	None
scaffold5385	3698	0.3507	0	9.021	no-hit	0	None
scaffold5387	3698	0.2891	0	6.357	Hymenoptera	8420	0
scaffold5389	3698	0.3605	0	12.288	no-hit	0	None
scaffold5382	3701	0.2821	0	22.215	no-hit	0	None
scaffold5379	3702	0.2874	0	7.885	no-hit	0	None
scaffold5381	3702	0.3177	0	15.668	no-hit	0	None
scaffold5377	3703	0.2918	5	149.197	Hemiptera	300	0
scaffold5376	3704	0.5022	0	0.243	no-hit	0	None
scaffold5375	3705	0.2548	0	44.284	no-hit	0	None
scaffold5371	3706	0.3203	0	10.729	no-hit	0	None
scaffold5374	3706	0.3764	0	264.915	Hemiptera	695	0
scaffold5362	3709	0.4055	0	29.033	no-hit	0	None
scaffold5363	3709	0.2755	0	15.614	no-hit	0	None
scaffold5359	3710	0.2569	0	25.487	no-hit	0	None
scaffold5354	3713	0.2825	0	8.262	no-hit	0	None
scaffold5353	3714	0.2795	0	12.71	no-hit	0	None
scaffold5350	3717	0.3239	0	8.473	no-hit	0	None
scaffold5348	3718	0.4661	0	0.233	Enterobacterales	2142	0
scaffold10846	3718	0.277	39	41.851	no-hit	0	None
scaffold5345	3719	0.4966	0	0.563	no-hit	0	None
scaffold5338	3721	0.2634	0	16.308	no-hit	0	None
scaffold5340	3721	0.4192	0	11.292	no-hit	0	None
scaffold5335	3722	0.5588	0	9.926	no-hit	0	None
scaffold5334	3724	0.301	0	80.25	no-hit	0	None
scaffold12079	3724	0.3145	1	24.298	no-hit	0	None
scaffold19656	3725	0.2784	0	26.34	no-hit	0	None
scaffold5330	3726	0.5448	0	0.268	no-hit	0	None
scaffold5327	3727	0.3198	0	12.428	no-hit	0	None
scaffold5324	3728	0.3015	0	17.516	no-hit	0	None
scaffold5323	3729	0.2574	0	7.226	no-hit	0	None
scaffold5319	3730	0.3804	0	21.077	no-hit	0	None
scaffold5320	3730	0.5732	0	0.358	no-hit	0	None
scaffold5321	3730	0.3461	0	9.152	no-hit	0	None
scaffold5322	3730	0.2831	0	5.721	no-hit	0	None
scaffold5315	3733	0.3137	0	17.75	no-hit	0	None
scaffold5313	3735	0.6819	0	13	no-hit	0	None
scaffold5309	3736	0.3009	0	43.492	no-hit	0	None
scaffold5310	3736	0.4716	0	0.109	Hymenoptera	2306	1
scaffold11780	3736	0.2994	135	40.588	no-hit	0	None
scaffold38455	3736	0.2846	1	86.048	no-hit	0	None
scaffold5306	3737	0.2732	0	7.435	no-hit	0	None
scaffold5308	3737	0.323	0	8.091	no-hit	0	None
scaffold5304	3738	0.5286	0	0.158	no-hit	0	None
scaffold5299	3740	0.3238	0	45.053	no-hit	0	None
scaffold5297	3741	0.3349	0	11.439	Hymenoptera	3866	0
scaffold5292	3744	0.3275	0	9.401	no-hit	0	None
scaffold5288	3747	0.2685	0	31.008	Hymenoptera	4338	1
scaffold5286	3748	0.3132	0	15.38	no-hit	0	None
scaffold5280	3752	0.4462	0	8.088	no-hit	0	None
scaffold5281	3752	0.6111	0	0.686	Hymenoptera	12378	3
scaffold5277	3754	0.3402	0	8.774	no-hit	0	None
scaffold5278	3754	0.3138	80	63.295	no-hit	0	None
scaffold5272	3755	0.2993	0	8.552	no-hit	0	None
scaffold13491	3755	0.3031	1	19.2	no-hit	0	None
scaffold5271	3757	0.2731	0	8.773	Hymenoptera	6838	0
scaffold5270	3758	0.2626	0	53.239	Hemiptera	289	0
scaffold9282	3760	0.2173	0	12.972	no-hit	0	None
scaffold9497	3760	0.2819	60	1914.78	Hemiptera	287	0
scaffold5267	3761	0.3124	0	16.886	Hymenoptera	6620	5
scaffold5263	3763	0.2788	0	7.525	no-hit	0	None
scaffold5264	3763	0.3162	0	34.566	no-hit	0	None
scaffold5262	3764	0.3324	0	12.316	no-hit	0	None
scaffold5258	3765	0.3124	0	14.351	Hymenoptera	148	0
scaffold11515	3765	0.3963	134	8.73	no-hit	0	None
scaffold5254	3767	0.305	0	8.777	no-hit	0	None
scaffold5255	3767	0.313	0	11.061	no-hit	0	None
scaffold5256	3767	0.3188	0	139.504	no-hit	0	None
scaffold5253	3768	0.2925	0	7.294	no-hit	0	None
scaffold5250	3770	0.1928	0	7.243	no-hit	0	None
scaffold5248	3771	0.3126	0	8.733	no-hit	0	None
scaffold5241	3774	0.2893	0	7.455	Hymenoptera	4922	0
scaffold5238	3775	0.5325	0	0.601	no-hit	0	None
scaffold15740	3776	0.2866	1	16.218	no-hit	0	None
scaffold5236	3777	0.3058	0	21.381	no-hit	0	None
scaffold5237	3777	0.3442	0	21.954	Hymenoptera	520	0
scaffold5233	3779	0.2831	0	8.074	Hymenoptera	6877	0
scaffold5234	3779	0.4533	0	0.392	no-hit	0	None
scaffold5232	3781	0.2994	0	7.845	Hymenoptera	5349	1
scaffold11472	3781	0.2982	8	94.376	no-hit	0	None
scaffold5229	3782	0.2398	0	18.7	no-hit	0	None
scaffold5230	3782	0.3009	0	9.367	Hymenoptera	4992	5
scaffold5228	3783	0.2979	0	11.834	no-hit	0	None
scaffold41114	3783	0.2409	59	26.541	Hemiptera	1218	0
scaffold5224	3784	0.4905	0	0.499	no-hit	0	None
scaffold5221	3787	0.2939	0	103.466	no-hit	0	None
scaffold5216	3790	0.4172	0	57.277	no-hit	0	None
scaffold5217	3790	0.2839	0	77.19	Hemiptera	430	0
scaffold5214	3792	0.2869	0	14.531	no-hit	0	None
scaffold5211	3794	0.2646	0	11.039	no-hit	0	None
scaffold5212	3794	0.2891	0	9.582	Hymenoptera	12045	1
scaffold5208	3795	0.346	0	16.129	no-hit	0	None
scaffold5209	3795	0.2925	0	6.964	no-hit	0	None
scaffold5206	3796	0.3491	0	97.935	no-hit	0	None
scaffold5207	3796	0.4879	0	0.321	no-hit	0	None
scaffold5203	3797	0.3271	0	21.208	no-hit	0	None
scaffold5200	3799	0.2959	0	18.16	no-hit	0	None
scaffold5197	3801	0.3073	0	8.597	no-hit	0	None
scaffold5193	3802	0.2656	0	7.081	Hymenoptera	2931	0
scaffold5195	3802	0.3217	0	13.998	no-hit	0	None
scaffold5192	3804	0.3131	0	21.832	no-hit	0	None
scaffold5186	3809	0.3014	0	8.695	Hymenoptera	4238	1
scaffold5187	3809	0.293	0	7.237	no-hit	0	None
scaffold5183	3810	0.274	0	8.148	no-hit	0	None
scaffold5182	3811	0.3078	0	47.032	no-hit	0	None
scaffold8539	3811	0.5895	1	2.153	no-hit	0	None
scaffold10902	3811	0.284	1	134.82	no-hit	0	None
scaffold5180	3812	0.2823	0	30.341	no-hit	0	None
scaffold5174	3813	0.7582	0	6.767	Primates	67399	0
scaffold5175	3813	0.2628	0	6.376	Hymenoptera	573	0
scaffold5178	3813	0.3202	0	8.331	Hymenoptera	9928	0
scaffold5171	3815	0.2878	0	35.177	no-hit	0	None
scaffold5172	3815	0.3237	0	144.19	no-hit	0	None
scaffold5163	3820	0.3249	0	20.688	no-hit	0	None
scaffold5158	3821	0.5302	0	0.801	no-hit	0	None
scaffold5153	3824	0.4108	0	53.035	no-hit	0	None
scaffold11283	3824	0.3803	1	74.08	no-hit	0	None
scaffold5149	3827	0.295	0	9.29	no-hit	0	None
scaffold5147	3829	0.252	0	7.965	no-hit	0	None
scaffold5145	3830	0.2961	0	6.907	Lepidoptera	405	0
scaffold9706	3830	0.2679	0	926.929	Hemiptera	1845	0
scaffold5143	3831	0.2159	0	29.94	no-hit	0	None
scaffold5140	3832	0.41	0	12.165	no-hit	0	None
scaffold5141	3832	0.2693	0	7.699	no-hit	0	None
scaffold5134	3834	0.2869	0	35.138	no-hit	0	None
scaffold5135	3834	0.5425	0	0.217	no-hit	0	None
scaffold5137	3834	0.3521	0	13.949	Hymenoptera	2467	0
scaffold5132	3835	0.2936	0	6.132	Hymenoptera	9668	0
scaffold5128	3837	0.2421	0	5.577	no-hit	0	None
scaffold5129	3837	0.3232	0	15.601	no-hit	0	None
scaffold5126	3838	0.3072	0	15.127	no-hit	0	None
scaffold5127	3838	0.2361	0	16.302	no-hit	0	None
scaffold5123	3840	0.3318	0	10.625	Hymenoptera	7098	1
scaffold5118	3843	0.3047	0	80.494	no-hit	0	None
scaffold5115	3845	0.2424	0	7.186	no-hit	0	None
scaffold5116	3845	0.3139	0	6.769	no-hit	0	None
scaffold13588	3845	0.302	44	79.309	no-hit	0	None
scaffold5114	3846	0.2886	0	27.455	no-hit	0	None
scaffold5109	3847	0.3151	0	21.944	no-hit	0	None
scaffold20135	3849	0.4916	100	0.19	Hymenoptera	139	0
scaffold5106	3851	0.2932	0	25.477	no-hit	0	None
scaffold5101	3853	0.2998	0	11.904	no-hit	0	None
scaffold5102	3853	0.3408	0	12.969	no-hit	0	None
scaffold11879	3854	0.2142	17	7.236	no-hit	0	None
scaffold8858	3855	0.3524	1	24.28	no-hit	0	None
scaffold5094	3856	0.2806	0	20.503	Enterobacterales	1990	0
scaffold5092	3857	0.2681	0	69.148	no-hit	0	None
scaffold5085	3861	0.2572	0	237.055	Hemiptera	697	1
scaffold16012	3861	0.2922	86	19.79	no-hit	0	None
scaffold5083	3862	0.2872	0	12.2	no-hit	0	None
scaffold5084	3862	0.5041	0	0.355	no-hit	0	None
scaffold5081	3863	0.3137	0	16.924	no-hit	0	None
scaffold5078	3865	0.4453	0	14.664	no-hit	0	None
scaffold5075	3867	0.2997	0	15.927	no-hit	0	None
scaffold5073	3868	0.2702	104	93.06	no-hit	0	None
scaffold5071	3870	0.3243	0	19.869	no-hit	0	None
scaffold13345	3871	0.3159	0	53.683	Hemiptera	154	0
scaffold18501	3871	0.3667	37	44.543	no-hit	0	None
scaffold5068	3872	0.3598	0	17.053	no-hit	0	None
scaffold5064	3873	0.3189	0	47.752	Hymenoptera	1136	0
scaffold5062	3874	0.4251	0	8.499	no-hit	0	None
scaffold5058	3875	0.5453	0	0.405	no-hit	0	None
scaffold5059	3875	0.3094	0	11.806	Hymenoptera	163	0
scaffold5052	3877	0.2701	0	11.688	no-hit	0	None
scaffold5049	3878	0.3644	0	11.483	Hymenoptera	8071	2
scaffold5050	3878	0.3172	0	8.366	no-hit	0	None
scaffold5048	3879	0.3024	0	7.871	no-hit	0	None
scaffold5047	3880	0.251	0	8.569	Hymenoptera	167	0
scaffold5042	3882	0.3269	0	10.301	no-hit	0	None
scaffold5038	3887	0.5619	0	0.14	no-hit	0	None
scaffold5036	3889	0.2988	0	10.392	no-hit	0	None
scaffold5035	3890	0.2828	0	49.913	Hemiptera	678	0
scaffold5032	3893	0.3244	0	11.191	Hymenoptera	10243	0
scaffold5031	3894	0.31	0	9.519	no-hit	0	None
scaffold5028	3895	0.228	17	55.687	no-hit	0	None
scaffold5025	3896	0.3057	0	55.587	no-hit	0	None
scaffold5027	3896	0.2972	0	8.678	Hymenoptera	965	0
scaffold5023	3898	0.3009	0	9.395	Hymenoptera	5215	0
scaffold5024	3898	0.5375	0	0.257	no-hit	0	None
scaffold5022	3899	0.2849	0	11.263	no-hit	0	None
scaffold5021	3900	0.3636	0	10.619	Hymenoptera	3141	0
scaffold18254	3901	0.329	463	395.075	no-hit	0	None
scaffold19145	3901	0.2788	34	171.288	no-hit	0	None
scaffold5017	3903	0.4686	0	0.381	Hymenoptera	1037	0
scaffold8290	3903	0.2957	1	13.579	no-hit	0	None
scaffold5016	3904	0.3179	0	8.806	no-hit	0	None
scaffold5012	3905	0.2988	0	9.423	Hymenoptera	12588	1
scaffold5011	3908	0.2631	0	9.091	no-hit	0	None
scaffold13827	3908	0.2901	71	43.766	no-hit	0	None
scaffold5008	3909	0.262	0	5.817	Hymenoptera	5005	1
scaffold5009	3909	0.2545	0	310.027	Hemiptera	3846	0
scaffold5005	3911	0.3053	0	8.643	no-hit	0	None
scaffold5001	3912	0.3226	0	50.083	Enterobacterales	4586	1
scaffold5002	3912	0.2812	0	65.632	Hemiptera	2835	0
scaffold4997	3913	0.2704	0	1997.2	no-hit	0	None
scaffold4998	3913	0.5663	0	0.287	no-hit	0	None
scaffold4992	3915	0.3029	0	14.668	no-hit	0	None
scaffold4993	3915	0.3201	0	13.034	no-hit	0	None
scaffold4994	3915	0.2741	0	6.687	Hymenoptera	1312	0
scaffold4990	3917	0.3314	0	11.143	no-hit	0	None
scaffold4991	3917	0.2816	0	7.361	no-hit	0	None
scaffold4988	3919	0.321	0	8.252	Hymenoptera	575	0
scaffold4989	3919	0.2771	0	6.603	no-hit	0	None
scaffold4987	3920	0.324	0	9.512	Hymenoptera	697	0
scaffold4986	3922	0.3575	0	12.802	no-hit	0	None
scaffold4980	3924	0.3116	35	106.862	no-hit	0	None
scaffold4981	3924	0.3091	0	7.713	Hymenoptera	2590	0
scaffold4982	3924	0.3369	0	16.87	no-hit	0	None
scaffold4976	3926	0.268	0	7.337	no-hit	0	None
scaffold8523	3926	0.4096	105	473.814	no-hit	0	None
scaffold18475	3926	0.4085	124	53.608	Primates	60365	0
scaffold8730	3927	0.3212	1	29.614	no-hit	0	None
scaffold4972	3929	0.2963	0	7.597	no-hit	0	None
scaffold4974	3929	0.4978	0	0.109	no-hit	0	None
scaffold4967	3930	0.2916	0	48.91	Hymenoptera	1480	0
scaffold4968	3930	0.3697	0	15.338	no-hit	0	None
scaffold13862	3931	0.4954	1	1.647	no-hit	0	None
scaffold4963	3932	0.3344	0	9.546	no-hit	0	None
scaffold4964	3932	0.2986	0	129.388	no-hit	0	None
scaffold4965	3932	0.5712	0	0.52	Hymenoptera	357	0
scaffold4962	3933	0.2972	0	11.843	no-hit	0	None
scaffold4960	3935	0.5403	0	0.312	no-hit	0	None
scaffold4955	3937	0.3058	0	13.506	no-hit	0	None
scaffold4953	3939	0.3156	0	11.519	no-hit	0	None
scaffold4950	3940	0.2977	0	9.145	no-hit	0	None
scaffold4951	3940	0.3218	0	9.912	no-hit	0	None
scaffold4952	3940	0.3437	0	13.235	no-hit	0	None
scaffold12566	3940	0.3364	1	38.668	no-hit	0	None
scaffold4947	3941	0.3021	42	102.978	no-hit	0	None
scaffold4948	3941	0.3124	0	24.902	no-hit	0	None
scaffold4949	3941	0.2791	0	13.969	no-hit	0	None
scaffold4945	3943	0.3013	0	7.501	Hymenoptera	1048	0
scaffold16801	3943	0.2881	97	9.025	no-hit	0	None
scaffold4944	3944	0.3027	0	23.974	Hemiptera	167	0
scaffold12083	3944	0.3426	1	180.826	no-hit	0	None
scaffold4940	3947	0.2713	0	7.451	no-hit	0	None
scaffold4937	3948	0.2829	0	6.564	Hymenoptera	12244	0
scaffold8911	3948	0.3473	58	36.241	no-hit	0	None
scaffold4936	3949	0.2889	0	9.874	no-hit	0	None
scaffold4933	3951	0.3576	0	11.823	no-hit	0	None
scaffold4927	3953	0.2904	0	9.685	Hymenoptera	294	0
scaffold4929	3953	0.2833	0	7.683	Hymenoptera	14022	0
scaffold4925	3954	0.2999	0	52.078	no-hit	0	None
scaffold4924	3955	0.4999	0	0.09	no-hit	0	None
scaffold4921	3956	0.3109	0	13.928	no-hit	0	None
scaffold4922	3956	0.317	0	8.162	no-hit	0	None
scaffold4923	3956	0.3261	0	37.709	Hymenoptera	306	0
scaffold4919	3957	0.3394	0	8.119	no-hit	0	None
scaffold4920	3957	0.5436	0	0.118	Hymenoptera	423	0
scaffold10486	3958	0.3154	236	25.684	no-hit	0	None
scaffold4916	3960	0.3255	0	17.334	no-hit	0	None
scaffold4917	3960	0.2922	0	7.247	no-hit	0	None
scaffold4915	3961	0.2946	0	29.129	no-hit	0	None
scaffold4910	3967	0.3242	0	51.312	Hemiptera	1336	0
scaffold4908	3968	0.4955	0	0.214	no-hit	0	None
scaffold4905	3969	0.296	0	8.999	Hemiptera	1395	0
scaffold4904	3970	0.3995	0	121.883	no-hit	0	None
scaffold4902	3971	0.3422	0	9.136	Hymenoptera	1229	0
scaffold4899	3972	0.3416	0	11.268	no-hit	0	None
scaffold4900	3972	0.3099	0	10.141	Hymenoptera	9866	1
scaffold4901	3972	0.2356	0	10.013	Hymenoptera	4864	0
scaffold13204	3973	0.2976	263	6.416	Hymenoptera	7155	1
scaffold4898	3974	0.3065	0	7.947	no-hit	0	None
scaffold4894	3976	0.2762	0	6.942	no-hit	0	None
scaffold13637	3977	0.3329	0	17.748	no-hit	0	None
scaffold4893	3979	0.2777	0	20.312	Hemiptera	1240	0
scaffold4892	3980	0.6389	0	13.84	no-hit	0	None
scaffold14451	3980	0.4896	457	157.782	no-hit	0	None
scaffold4890	3981	0.2969	0	9.889	no-hit	0	None
scaffold4891	3981	0.3034	0	14.84	no-hit	0	None
scaffold4887	3984	0.2939	0	8.495	no-hit	0	None
scaffold4883	3985	0.2366	0	7.395	Hymenoptera	2411	0
scaffold4884	3985	0.3144	0	8.074	Ustilaginales	6466	1
scaffold11272	3985	0.3066	2	58.744	no-hit	0	None
scaffold4881	3987	0.2608	0	5.533	no-hit	0	None
scaffold12634	3987	0.2667	1	94.769	Hemiptera	206	0
scaffold4878	3993	0.3118	0	8.895	no-hit	0	None
scaffold12027	3993	0.3448	191	658.805	Hemiptera	169	0
scaffold4876	3994	0.2651	0	8.389	no-hit	0	None
scaffold4877	3994	0.4785	0	0.304	no-hit	0	None
scaffold4873	3996	0.3591	0	11.105	Hymenoptera	4138	1
scaffold4874	3996	0.3256	0	16.945	no-hit	0	None
scaffold12906	3996	0.2916	1	10.438	no-hit	0	None
scaffold4870	3999	0.3488	0	64.357	no-hit	0	None
scaffold18462	3999	0.2452	186	19.628	no-hit	0	None
scaffold9358	4003	0.2974	1	48.356	no-hit	0	None
scaffold4868	4004	0.3619	0	9.309	no-hit	0	None
scaffold4865	4006	0.5262	0	0.089	no-hit	0	None
scaffold4861	4008	0.3283	0	9.655	Hymenoptera	3124	2
scaffold14323	4008	0.3107	329	28.21	no-hit	0	None
scaffold4860	4009	0.2988	0	17.607	no-hit	0	None
scaffold4859	4010	0.2726	0	7.433	Hymenoptera	15182	1
scaffold4856	4012	0.3021	0	128.352	no-hit	0	None
scaffold4858	4012	0.2839	0	11.467	Hymenoptera	589	0
scaffold12440	4012	0.3049	1	37.417	no-hit	0	None
scaffold4854	4013	0.3063	0	79.349	no-hit	0	None
scaffold4852	4014	0.5713	0	0.859	no-hit	0	None
scaffold4850	4018	0.2807	0	13.842	no-hit	0	None
scaffold4851	4018	0.2666	0	88.889	Hemiptera	851	0
scaffold14147	4018	0.3116	29	109.224	no-hit	0	None
scaffold4849	4019	0.319	0	52.597	no-hit	0	None
scaffold4847	4020	0.3154	0	16.104	no-hit	0	None
scaffold4845	4021	0.2895	0	10.6	Hymenoptera	6999	0
scaffold4846	4021	0.2837	10	95.898	Hemiptera	8399	0
scaffold4842	4023	0.257	0	6.117	Hymenoptera	3622	0
scaffold4843	4023	0.3408	0	15.024	Hymenoptera	1900	0
scaffold14321	4024	0.303	420	8.012	Coleoptera	264	0
scaffold4839	4026	0.3117	0	8.253	no-hit	0	None
scaffold4836	4028	0.2929	0	6.786	Hymenoptera	3850	0
scaffold4835	4029	0.3013	0	19.27	no-hit	0	None
scaffold4832	4030	0.2876	0	7.384	no-hit	0	None
scaffold4834	4030	0.5293	0	435.317	no-hit	0	None
scaffold4828	4033	0.3094	0	20.074	no-hit	0	None
scaffold4829	4033	0.3737	0	113.753	Hemiptera	2336	2
scaffold4820	4036	0.2748	0	73.172	no-hit	0	None
scaffold4818	4038	0.2618	0	6.237	Hymenoptera	11778	1
scaffold4817	4039	0.3328	0	87.887	no-hit	0	None
scaffold8760	4039	0.3262	1	1024.98	no-hit	0	None
scaffold4810	4044	0.2925	0	16.662	no-hit	0	None
scaffold4811	4044	0.251	0	41.681	no-hit	0	None
scaffold4812	4044	0.3158	0	9.528	Hymenoptera	505	0
scaffold8921	4044	0.3144	1	24.373	no-hit	0	None
scaffold8511	4045	0.3441	32	215.196	no-hit	0	None
scaffold4805	4046	0.281	0	6.578	no-hit	0	None
scaffold4806	4046	0.2941	0	33.805	no-hit	0	None
scaffold4804	4047	0.2861	0	8.765	Hymenoptera	3426	0
scaffold4802	4048	0.3063	0	6.606	no-hit	0	None
scaffold4801	4050	0.2827	0	7.781	no-hit	0	None
scaffold4800	4051	0.3278	0	21.876	no-hit	0	None
scaffold4799	4053	0.5586	0	0.795	Hymenoptera	3272	0
scaffold40650	4054	0.3038	2	133.188	no-hit	0	None
scaffold4795	4056	0.2231	0	22.058	no-hit	0	None
scaffold4797	4056	0.2996	0	13.967	no-hit	0	None
scaffold4787	4064	0.3071	0	13.853	no-hit	0	None
scaffold4788	4064	0.5544	0	0.34	Hymenoptera	11640	0
scaffold14057	4068	0.2941	206	33.786	no-hit	0	None
scaffold4785	4069	0.3035	0	38.255	no-hit	0	None
scaffold4781	4070	0.3057	0	14.064	no-hit	0	None
scaffold4783	4070	0.2953	0	9.146	Hymenoptera	9721	0
scaffold8676	4071	0.2862	1	24.079	no-hit	0	None
scaffold4779	4074	0.513	0	2.368	no-hit	0	None
scaffold13805	4075	0.2914	146	94.395	no-hit	0	None
scaffold4775	4076	0.5059	0	1.129	no-hit	0	None
scaffold12304	4076	0.2727	236	276.612	Hemiptera	1628	0
scaffold4772	4077	0.5077	0	0.434	no-hit	0	None
scaffold4773	4077	0.3331	0	10.263	no-hit	0	None
scaffold4774	4077	0.2911	0	6.407	Hymenoptera	231	0
scaffold4768	4080	0.3076	0	7.971	no-hit	0	None
scaffold4766	4082	0.3246	0	8.22	Hymenoptera	1484	0
scaffold4764	4086	0.2903	0	13.249	no-hit	0	None
scaffold4760	4087	0.3465	0	43.988	Enterobacterales	3651	0
scaffold4757	4088	0.3136	0	10.144	no-hit	0	None
scaffold7875	4088	0.2856	68	18.33	no-hit	0	None
scaffold4755	4090	0.4577	0	13.518	no-hit	0	None
scaffold4751	4092	0.4836	0	0.17	Hymenoptera	1133	0
scaffold11548	4093	0.2798	65	49.03	no-hit	0	None
scaffold15083	4093	0.2385	0	34.683	Hemiptera	360	0
scaffold4748	4094	0.3312	0	12.582	no-hit	0	None
scaffold4747	4095	0.294	0	15.489	no-hit	0	None
scaffold4744	4098	0.2611	0	10.289	no-hit	0	None
scaffold4741	4100	0.2973	0	9.167	no-hit	0	None
scaffold4743	4100	0.3059	0	9.483	Hymenoptera	6032	0
scaffold9016	4101	0.3347	41	94.806	no-hit	0	None
scaffold4739	4102	0.3267	0	11.056	no-hit	0	None
scaffold4740	4102	0.4381	0	66.488	no-hit	0	None
scaffold4737	4104	0.2858	0	84.23	Hemiptera	682	0
scaffold4738	4104	0.4006	0	10.342	no-hit	0	None
scaffold4736	4105	0.3281	0	8.634	no-hit	0	None
scaffold4731	4110	0.5148	0	0.56	no-hit	0	None
scaffold4728	4113	0.2654	251	237.68	no-hit	0	None
scaffold4727	4114	0.3418	0	16.332	no-hit	0	None
scaffold4725	4117	0.2456	12	57.482	Hemiptera	1382	0
scaffold4726	4117	0.2956	0	7.758	Hymenoptera	5360	0
scaffold32862	4117	0.3261	2	71.547	no-hit	0	None
scaffold4720	4120	0.3374	0	10.721	Hymenoptera	939	0
scaffold4716	4121	0.2667	0	12.598	no-hit	0	None
scaffold4717	4121	0.2839	0	8.033	Hymenoptera	7053	0
scaffold4719	4121	0.2778	0	32.055	no-hit	0	None
scaffold37233	4122	0.3552	335	28.179	no-hit	0	None
scaffold4714	4123	0.2942	0	7.331	no-hit	0	None
scaffold4712	4125	0.2778	0	10.371	Hymenoptera	2670	0
scaffold4710	4127	0.3424	0	17.342	no-hit	0	None
scaffold4708	4128	0.2619	0	6.122	no-hit	0	None
scaffold4706	4129	0.2761	0	11.508	no-hit	0	None
scaffold4701	4130	0.2874	0	14.564	no-hit	0	None
scaffold4703	4130	0.3574	0	181.273	Enterobacterales	4989	0
scaffold4699	4131	0.3716	0	8.854	no-hit	0	None
scaffold4700	4131	0.2917	0	7.486	no-hit	0	None
scaffold4698	4133	0.307	0	12.906	Hymenoptera	11009	3
scaffold4692	4135	0.3792	0	10.913	no-hit	0	None
scaffold4691	4136	0.287	0	7.686	Hymenoptera	244	0
scaffold4690	4139	0.2648	0	58.66	Hemiptera	1502	0
scaffold4685	4141	0.2731	0	6.75	Hymenoptera	6867	5
scaffold4683	4142	0.2796	0	12.859	no-hit	0	None
scaffold4682	4143	0.2636	0	10.707	no-hit	0	None
scaffold9701	4144	0.3026	244	50.073	no-hit	0	None
scaffold4679	4145	0.2721	0	82.902	Lepidoptera	1382	0
scaffold4680	4145	0.2743	0	6.992	Hymenoptera	1275	0
scaffold10482	4145	0.293	1	10.62	no-hit	0	None
scaffold4678	4146	0.308	0	7.259	no-hit	0	None
scaffold4676	4149	0.2721	0	117.683	Hemiptera	1042	0
scaffold4674	4150	0.2742	0	22.536	no-hit	0	None
scaffold4673	4151	0.2515	0	25.242	no-hit	0	None
scaffold4669	4153	0.2776	0	9.672	no-hit	0	None
scaffold4671	4153	0.2755	0	36.177	no-hit	0	None
scaffold4664	4161	0.3235	0	11.187	no-hit	0	None
scaffold4665	4161	0.3259	0	13.244	no-hit	0	None
scaffold20283	4161	0.2403	0	1286.86	Hemiptera	1980	0
scaffold4660	4162	0.3126	0	11.586	no-hit	0	None
scaffold4662	4162	0.3114	0	18.607	no-hit	0	None
scaffold4658	4164	0.3098	0	12.86	no-hit	0	None
scaffold4657	4166	0.5394	0	0.049	Hymenoptera	5389	0
scaffold4656	4167	0.306	0	12.027	Hymenoptera	8187	1
scaffold4654	4168	0.5453	0	0.452	no-hit	0	None
scaffold9916	4169	0.3673	1	511.702	Hemiptera	10665	2
scaffold4650	4172	0.2907	0	11.809	no-hit	0	None
scaffold11090	4172	0.2829	1	106.347	no-hit	0	None
scaffold12506	4173	0.3002	16	50.376	no-hit	0	None
scaffold4647	4175	0.2565	0	118.291	no-hit	0	None
scaffold4644	4179	0.3254	0	9.096	no-hit	0	None
scaffold4642	4180	0.2876	0	17.717	no-hit	0	None
scaffold4643	4180	0.3144	0	14.894	no-hit	0	None
scaffold11549	4181	0.3509	0	173.599	no-hit	0	None
scaffold4639	4183	0.5365	0	0.245	no-hit	0	None
scaffold7116	4183	0.2836	1	80.406	no-hit	0	None
scaffold4638	4184	0.2634	0	7.369	Hymenoptera	278	1
scaffold4636	4185	0.3297	0	7.905	no-hit	0	None
scaffold10254	4185	0.4267	49	76.775	no-hit	0	None
scaffold4632	4188	0.2638	0	8.513	Hymenoptera	723	0
scaffold4630	4189	0.3619	0	10.462	no-hit	0	None
scaffold4631	4189	0.5746	0	7.293	Enterobacterales	39274	0
scaffold4627	4190	0.3093	0	7.133	Hymenoptera	4747	1
scaffold4628	4190	0.3095	0	21.631	no-hit	0	None
scaffold4629	4190	0.3449	0	19.946	no-hit	0	None
scaffold4625	4192	0.2879	0	7.504	Hymenoptera	7538	0
scaffold4624	4194	0.3174	0	7.792	no-hit	0	None
scaffold4621	4195	0.3385	0	8.947	no-hit	0	None
scaffold4619	4196	0.3217	0	42.054	no-hit	0	None
scaffold4620	4196	0.2965	0	16.702	no-hit	0	None
scaffold4612	4200	0.2545	0	8.688	Hymenoptera	1448	0
scaffold4609	4202	0.2899	0	28.403	no-hit	0	None
scaffold4607	4203	0.3236	0	16.358	no-hit	0	None
scaffold4608	4203	0.2853	0	7.825	no-hit	0	None
scaffold4604	4204	0.245	0	43.243	no-hit	0	None
scaffold4605	4204	0.2571	0	7.32	no-hit	0	None
scaffold4606	4204	0.2562	0	653.593	Hemiptera	6168	0
scaffold14428	4206	0.2846	387	19.372	Hymenoptera	1065	1
scaffold4601	4207	0.3126	0	8.149	no-hit	0	None
scaffold4600	4209	0.3393	0	8.307	no-hit	0	None
scaffold4597	4211	0.2707	0	16.49	no-hit	0	None
scaffold4596	4212	0.4399	0	2.672	no-hit	0	None
scaffold4594	4213	0.3064	0	21.581	no-hit	0	None
scaffold12563	4213	0.3073	266	103.873	no-hit	0	None
scaffold4592	4214	0.3441	0	7.516	no-hit	0	None
scaffold4593	4214	0.3232	0	26.908	no-hit	0	None
scaffold4589	4215	0.358	0	10.932	Hymenoptera	1190	0
scaffold4590	4215	0.5101	0	1.358	no-hit	0	None
scaffold4585	4217	0.3405	0	11.97	no-hit	0	None
scaffold4582	4218	0.302	0	19.224	no-hit	0	None
scaffold4580	4220	0.2709	0	7.715	no-hit	0	None
scaffold4578	4221	0.2748	0	6.541	Hymenoptera	1828	0
scaffold4577	4222	0.5121	0	0.409	no-hit	0	None
scaffold4576	4224	0.2921	0	9.96	no-hit	0	None
scaffold10577	4226	0.4786	327	0.667	no-hit	0	None
scaffold11261	4226	0.3259	130	42.082	no-hit	0	None
scaffold15055	4226	0.3572	1	67.33	Hemiptera	1021	0
scaffold4574	4228	0.2611	0	6.096	no-hit	0	None
scaffold4572	4229	0.3788	0	30.798	no-hit	0	None
scaffold4567	4233	0.2899	0	18.082	no-hit	0	None
scaffold4560	4236	0.2665	0	7.927	Hymenoptera	148	0
scaffold4561	4236	0.407	0	16.251	no-hit	0	None
scaffold4557	4240	0.6085	0	12.987	Micrococcales	300	1
scaffold10749	4240	0.3634	423	245.697	no-hit	0	None
scaffold4550	4244	0.3353	0	12.802	Hymenoptera	11610	1
scaffold4542	4248	0.3157	0	9.643	Hymenoptera	921	1
scaffold10345	4255	0.2969	243	55.296	no-hit	0	None
scaffold4539	4256	0.2939	0	7.909	no-hit	0	None
scaffold4538	4257	0.2698	121	8.958	no-hit	0	None
scaffold4537	4258	0.3166	0	8.029	no-hit	0	None
scaffold4534	4259	0.2879	0	10.372	no-hit	0	None
scaffold4535	4259	0.3827	0	273.328	Hemiptera	4062	0
scaffold4529	4261	0.2504	0	46.428	no-hit	0	None
scaffold4528	4262	0.4263	0	9.346	no-hit	0	None
scaffold6784	4265	0.2664	1	32.461	Hemiptera	2448	0
scaffold6589	4268	0.2674	1	80.57	no-hit	0	None
scaffold9354	4268	0.3185	102	115.307	no-hit	0	None
scaffold4527	4269	0.3856	0	21.747	no-hit	0	None
scaffold4524	4274	0.3294	0	18.72	no-hit	0	None
scaffold16558	4276	0.2988	227	91.378	no-hit	0	None
scaffold10087	4277	0.3476	223	35.359	no-hit	0	None
scaffold4520	4279	0.5261	0	0.237	no-hit	0	None
scaffold4517	4281	0.3025	0	10.832	no-hit	0	None
scaffold4514	4283	0.2239	0	63.246	Hemiptera	990	0
scaffold4515	4283	0.7348	0	11.442	no-hit	0	None
scaffold4512	4285	0.2954	0	24.431	Hymenoptera	1067	0
scaffold4510	4287	0.2734	0	8.357	no-hit	0	None
scaffold4508	4288	0.6819	0	1.552	Hymenoptera	8685	0
scaffold7953	4288	0.2731	209	124.292	no-hit	0	None
scaffold4503	4290	0.304	0	86.33	Hemiptera	2585	0
scaffold4498	4294	0.2478	0	17.932	no-hit	0	None
scaffold12677	4295	0.2771	166	48.158	no-hit	0	None
scaffold4495	4296	0.5477	0	0.151	no-hit	0	None
scaffold4496	4296	0.2635	0	22.09	no-hit	0	None
scaffold4491	4297	0.3025	0	34.714	no-hit	0	None
scaffold4493	4297	0.2707	0	6.336	Hymenoptera	4859	0
scaffold4487	4300	0.314	0	5.891	Hymenoptera	558	0
scaffold12003	4304	0.3256	29	40.492	no-hit	0	None
scaffold4483	4306	0.3156	0	13.756	no-hit	0	None
scaffold4484	4306	0.3021	0	8.957	no-hit	0	None
scaffold4479	4308	0.2845	2	130.529	Hemiptera	9086	0
scaffold4475	4309	0.3184	0	9.557	Hymenoptera	1243	0
scaffold4476	4309	0.2959	0	31.509	no-hit	0	None
scaffold4477	4309	0.2808	0	180.947	no-hit	0	None
scaffold6938	4309	0.3607	1	20.951	no-hit	0	None
scaffold4473	4311	0.283	3	189.262	Hemiptera	874	1
scaffold4474	4311	0.2406	1	69.451	no-hit	0	None
scaffold34049	4312	0.2821	34	86.349	no-hit	0	None
scaffold4472	4313	0.2564	0	10.262	Hymenoptera	2870	0
scaffold4470	4315	0.5574	0	0.691	Enterobacterales	6196	0
scaffold8918	4315	0.2662	119	44.302	no-hit	0	None
scaffold4464	4321	0.2796	0	8.293	Hymenoptera	1863	0
scaffold4463	4322	0.282	0	374.18	Hemiptera	158	0
scaffold4462	4324	0.3481	0	17.071	no-hit	0	None
scaffold7323	4325	0.2777	176	350.013	Hemiptera	180	0
scaffold4458	4326	0.2483	0	13.769	no-hit	0	None
scaffold4456	4327	0.2762	0	110.331	no-hit	0	None
scaffold4455	4328	0.3101	0	15.29	no-hit	0	None
scaffold4450	4332	0.3733	0	30.647	no-hit	0	None
scaffold4448	4334	0.3276	0	36.066	no-hit	0	None
scaffold4444	4335	0.2575	47	130.748	no-hit	0	None
scaffold22041	4337	0.2685	113	91.387	no-hit	0	None
scaffold9167	4338	0.4293	143	30.678	no-hit	0	None
scaffold4437	4339	0.5241	0	0.1	no-hit	0	None
scaffold4434	4344	0.3013	0	7.269	Hymenoptera	14856	0
scaffold4432	4346	0.3822	0	10.393	Hymenoptera	5945	1
scaffold4431	4347	0.7311	0	13.239	Micrococcales	6623	0
scaffold4429	4349	0.2764	0	6.798	no-hit	0	None
[truncated: 6,398 more rows]
